1           **Simulations of the effect of diffusion on asymmetric spin echo based quantitative**  
2           **BOLD: An investigation of the origin of deoxygenated blood volume overestimation**

3           Alan J Stone<sup>1</sup>, Naomi C Holland<sup>2</sup>, Avery J L Berman<sup>3</sup>, Nicholas P Blockley<sup>1\*</sup>

4           <sup>1</sup>Wellcome Centre for Integrative Neuroimaging, FMRIB, Nuffield Department of Clinical  
5           Neurosciences, University of Oxford, Oxford, UK, <sup>2</sup>Department of Physics, University of  
6           Oxford, Oxford, UK, <sup>3</sup>Athinoula A. Martinos Center for Biomedical Imaging, Department of  
7           Radiology, Harvard Medical School, Massachusetts General Hospital, Charlestown, MA

8

9           **Running Title:** The effect of diffusion on ASE qBOLD

10          **Address for correspondence:** \*Nicholas Blockley, School of Life Sciences, The University  
11          of Nottingham Medical School, Queen's Medical Centre, Nottingham, NG7 2UH, UK.

12          **Telephone No.:** +44 115 8230146

13          **E-mail:** [nicholas.blockley@nottingham.ac.uk](mailto:nicholas.blockley@nottingham.ac.uk)

14          **Twitter:** @nicblockley

15          **Word Count:** 6777

16          **Figures:** 8 figures and 1 table (+ 7 supplementary figures)

17          **References:** 33

18          **Funding Acknowledgements:** This work was supported by the Engineering and Physical  
19          Sciences Research Council [grant number EP/K025716/1]. The Wellcome Centre for  
20          Integrative Neuroimaging is supported by core funding from the Wellcome Trust [grant  
21          203139/Z/16/Z].

22

23

## 1 **Abstract**

2 Quantitative BOLD (qBOLD) is a technique for mapping oxygen extraction fraction (OEF)  
3 and deoxygenated blood volume (DBV) in the human brain. Recent measurements using an  
4 asymmetric spin echo (ASE) based qBOLD approach produced estimates of DBV which  
5 were systematically higher than measurements from other techniques. In this study, we  
6 investigate two hypotheses for the origin of this DBV overestimation using simulations and  
7 consider the implications for experimental measurements. Investigations were performed by  
8 combining Monte Carlo simulations of extravascular signal with an analytical model of the  
9 intravascular signal.

10 *Hypothesis 1:* DBV overestimation is due to the presence of intravascular signal  
11 which is not accounted for in the analysis model. Intravascular signal was found to have a  
12 weak effect on qBOLD parameter estimates.

13 *Hypothesis 2:* DBV overestimation is due to the effects of diffusion which are not  
14 accounted for in the analysis model. The effect of diffusion on the extravascular signal was  
15 found to result in a vessel radius dependent variation in qBOLD parameter estimates. In  
16 particular, DBV overestimation peaks for vessels with radii from 20 to 30  $\mu\text{m}$  and is OEF  
17 dependent. This results in the systematic underestimation of OEF.

18 *Implications:* The impact on experimental qBOLD measurements was investigated by  
19 simulating a more physiologically realistic distribution of vessel sizes with a small number of  
20 discrete radii. Overestimation of DBV consistent with previous experiments was observed,  
21 which was also found to be OEF dependent. This results in the progressive underestimation  
22 of the measured OEF. Furthermore, the relationship between the measured OEF and the true  
23 OEF was found to be dependent on echo time and spin echo displacement time.

24 The results of this study demonstrate the limitations of current ASE based qBOLD  
25 measurements and provide a foundation for the optimisation of future acquisition approaches.

- 1 Keywords: quantitative BOLD, magnetic resonance imaging, Monte Carlo simulation, oxygen
- 2 extraction fraction, cerebral blood volume

## 1 **Introduction**

2 The quantitative BOLD (qBOLD) technique is a relaxometry based approach for mapping  
3 oxygen extraction fraction (OEF) and deoxygenated blood volume (DBV) in the human brain  
4 (He and Yablonskiy, 2007). An elevated OEF is indicative of tissue at risk of infarction, such  
5 as the penumbral tissue surrounding the core infarct of an ischaemic stroke (Astrup et al.,  
6 1981). When combined with a measurement of cerebral blood flow (CBF), the cerebral  
7 metabolic rate of oxygen consumption ( $CMRO_2$ ) can also be estimated (Kety and Schmidt,  
8 1948). Since qBOLD can provide this valuable information in a non-invasive and rapidly  
9 acquired manner, it has a great deal of potential for providing these quantitative physiological  
10 measurements in clinical research applications.

11 The analytical model used to analyse qBOLD data assumes that the signal decay  
12 behaves as though it were in the static dephasing regime (SDR) i.e. the diffusion of water in  
13 tissue does not influence the signal decay due to magnetic field inhomogeneity (Yablonskiy  
14 and Haacke, 1994). However, simulations of the Gradient Echo Sampling of Spin Echo  
15 (GESSE) pulse sequence, which is often used to acquire qBOLD data, have shown that this is  
16 not the case and that diffusion introduces a vessel size dependent effect on the signal decay  
17 (Dickson et al., 2010; Pannetier et al., 2014). However, qBOLD data can also be acquired  
18 using the Asymmetric Spin Echo (ASE) pulse sequence, which provides a direct  
19 measurement of the reversible relaxation rate,  $R_2'$ , and eliminates the need to remove  $R_2$ -  
20 weighting from the acquired signal (required by GESSE) (An and Lin, 2003; Stone and  
21 Blockley, 2017). Nevertheless, it is unclear whether a similar diffusion effect is present in  
22 ASE data. Interestingly estimates of DBV made using this ASE based acquisition are  
23 systematically higher than those reported for GESSE based measurements (He and  
24 Yablonskiy, 2007), suggesting that different effects may be at play.

1           The overestimation of DBV by ASE based qBOLD is at least partially responsible for  
2 the underestimation of the OEF (Stone and Blockley, 2017). This overestimation has  
3 previously been suggested to be due to the presence of intravascular blood signal, which is  
4 not accounted for in the analytical qBOLD model, with flow crushing gradients proposed as a  
5 solution (An and Lin, 2003). However, since it has been shown that diffusion results in  
6 additional signal attenuation (Dickson et al., 2010), which is similarly unaccounted for in the  
7 analytical qBOLD model, this may also provide a mechanism for DBV overestimation.

8           In this study, we investigate both mechanisms to discover whether either can account  
9 for the overestimation of DBV in ASE based qBOLD. The effect of diffusion on the  
10 extravascular tissue signal was examined using Monte Carlo simulations (Boxerman et al.,  
11 1995) and the intravascular blood signal was simulated using a recently published analytical  
12 model (Berman and Pike, 2018). Whilst these effects are initially considered using  
13 simulations with vessels of a single radius, these results are also integrated using a more  
14 physiologically realistic vessel size distribution to investigate sources of systematic error in  
15 real world measurements.

16

## 17 **Theory**

18 Transverse signal decay results from dephasing of the net magnetisation due to the presence  
19 of magnetic field inhomogeneity at multiple scales. The effect of these scales on the qBOLD  
20 signal can be considered with reference to a spin echo pulse sequence. At the microscopic  
21 scale spins experience local magnetic field inhomogeneities caused by neighbouring spins  
22 that are rapidly varying. Due to this rapid magnetic field variation, the phase evolution cannot  
23 be rewound by the application of a refocussing pulse. The resulting signal decay is described  
24 by the irreversible transverse relaxation rate  $R_2$ . The macroscopic scale describes magnetic  
25 field inhomogeneity on the scale of the head e.g. due to the nasal sinuses or ear canals. This

1 effect can be reversed by a refocussing pulse due to its static nature, enabling the phase  
2 evolution in the period before the refocussing pulse to be rewound by the time the spin echo  
3 is formed. At this scale the signal decay is described by the reversible relaxation rate  $R_2'$  and  
4 referred to as the SDR. At intermediate scales, often referred to as the mesoscopic scale,  
5 diffusion becomes increasingly important as the so called Diffusion Narrowing Regime is  
6 approached. The transition between these regimes is dependent on the scale of the magnetic  
7 field inhomogeneity and the distance the spin travels due to diffusion. More precisely, the  
8 characteristic diffusion time,  $\tau_D$ ,

$$\tau_D \propto R_c^2 / D \quad (1)$$

9 which is dependent on the radius,  $R_c$ , of the deoxygenated blood vessel and the diffusion  
10 coefficient,  $D$ , is on the order of the time taken by a water molecule to diffuse a distance  
11 equivalent to the radius of the vessel (Yablonskiy and Haacke, 1994). This results in an  
12 averaging of the magnetic field distribution surrounding the vessels and a loss of phase  
13 history, meaning that signal cannot be efficiently recovered by a refocussing pulse.

14

### 15 Modelling the qBOLD signal

16 The qBOLD model relies on the known relationship between  $R_2'$  and the baseline OEF,  $E_0$ ,  
17 and deoxygenated blood volume fraction,  $V_0$ , for a network of randomly oriented blood  
18 vessels approximated as infinite cylinders (Yablonskiy and Haacke, 1994),

$$R_2' = \frac{4}{3} \pi \gamma B_0 \Delta\chi V_0 Hct E_0 \quad (2)$$

19 where  $\gamma$  is the proton gyromagnetic ratio,  $B_0$  is the main magnetic field,  $\Delta\chi$  is the difference  
20 in volume magnetic susceptibility between fully oxygenated and fully deoxygenated blood in  
21 CGS units and  $Hct$  is the haematocrit. In this work it was assumed that the arterial oxygen  
22 saturation is 100% and hence  $E_0=1-Y$ , where  $Y$  is the venous oxygen saturation. Further

1 modelling has shown that the  $R_2'$ -weighted signal is not purely monoexponential and can be  
 2 approximated for two distinct regimes (An and Lin, 2000; Yablonskiy and Haacke, 1994),

$$S^S(\tau) = S_0 e^{-t_E R_2} e^{-0.3 (\tau R_2')^2 / V_0}, \quad \tau < \frac{1.5 V_0}{R_2'} \quad (3)$$

$$S^L(\tau) = S_0 e^{-t_E R_2} e^{-\tau R_2' V_0}, \quad \tau > \frac{1.5 V_0}{R_2'} \quad (4)$$

3 where  $t_E$  is the echo time and  $\tau$  is the spin echo displacement time. In the long  $\tau$  regime ( $S^L$ ,  
 4 Eq. (4)) the signal decay takes a monoexponential form, whilst in the short  $\tau$  regime ( $S^S$ , Eq.  
 5 (3)) the signal follows a quadratic exponential form. A log-linear fit to long  $\tau$  data enables  $R_2'$   
 6 to be estimated. Furthermore, comparison of the measured signal at  $\tau=0$  ( $S_{meas}^S(0)$ ) with the  
 7 intercept extrapolated from long  $\tau$  data ( $S_{extrap}^L(0)$ ) enables  $V_0$  to be calculated.

$$V_0 = \ln S_{extrap}^L(0) - \ln S_{meas}^S(0) \quad (5)$$

8 Henceforth we will refer to this as the SDR qBOLD model.

9

### 10 Simulating the effect of diffusion

11 Monte Carlo simulations of the qBOLD signal were performed by repeating the following  
 12 three steps for each simulated proton.

13 Step 1: Generate a system of vessels. The vessel system was constrained to fit within  
 14 a sphere of radius  $R_s$ . Vessel origin points ( $O$ ) were randomly selected, with half placed on  
 15 the surface of the sphere and half within the sphere to ensure a homogenous vessel density  
 16 following previous work (Dickson et al., 2010). A uniform distribution of points over the  
 17 surface of the sphere was ensured by generating a unit vector ( $X_i$ ) from a normally distributed  
 18 random number generator (mean 0, standard deviation 1) and scaling by  $R_s$  (Muller, 1959).  
 19 Within the sphere, uniform density was maintained by taking account of the increased  
 20 volume occupied by points far from the centre of the system. This scaling factor,  $U$ , is  
 21 selected from a uniform distribution of random numbers (range 0 to 1).

$$(O_1, O_2, O_3) = \begin{cases} R_s \frac{(X_1, X_2, X_3)}{\sqrt{X_1^2 + X_2^2 + X_3^2}}, & \text{on sphere surface} \\ R_s U^{1/3} \frac{(X_1, X_2, X_3)}{\sqrt{X_1^2 + X_2^2 + X_3^2}}, & \text{within sphere} \end{cases} \quad (6)$$

1 Vessels were modelled as randomly oriented infinitely long cylinders with a single radius,  $R_c$ ,  
 2 placed at the vessel origin points described by Eq. (6) and extended out to the surface of the  
 3 sphere. This enable the volume occupied by each vessel to be calculated with further vessels  
 4 added to the system until the target blood volume fraction ( $V_f$ ) was reached. Random  
 5 orientation was ensured by generating a unit vector from a normally distributed random  
 6 number generator (mean 0, standard deviation 1).

7 Step 2: Proton random walk. Protons are initially placed at the centre of the vessel  
 8 system. Each step taken by the proton is independently selected along each dimension from a  
 9 normal distribution of random numbers with mean 0 and standard deviation  $\sigma$  with diffusion  
 10 coefficient,  $D$ , and time interval between steps,  $\Delta t$ .

$$\sigma = \sqrt{2 D \Delta t} \quad (7)$$

11 Step 3: Estimate the phase accrued at each step. The phase,  $\Delta\phi$ , accumulated by the  
 12 proton during each time interval is calculated by summing over the field contributions from  
 13 all  $N$  vessels (Boxerman et al., 1995),

$$\Delta\phi = 2\pi \gamma B_0 \Delta t (1 - Y) Hct \Delta\chi \sum_{i=1}^N \left(\frac{R_c}{r_i}\right)^2 \cos 2\varphi_i \sin^2 \theta_i, \quad r_i \geq R_c \quad (8)$$

14 where  $\theta$  is the angle of the vessel with respect to  $B_0$ ,  $\varphi$  is the angle with respect to the  
 15 projection of  $B_0$  onto a plane orthogonal to the vessel,  $r_i$  is the perpendicular distance to the  
 16 vessel and  $Y$  is the blood oxygen saturation (see Fig. 1). Only the equation for the magnetic  
 17 field outside of the vessel is presented, since only extravascular signal was simulated.

18 By appropriate combination of the phase accrued in each interval it is possible to  
 19 simulate the phase evolution of the ASE and GESSE pulse sequences as a function of  $\tau$ ,  $\phi(\tau)$ .



$$\phi(\tau) = \sum_{j=1}^m \Delta\phi_j - \sum_{j=m+1}^n \Delta\phi_j \quad (9)$$

1 where  $m$  defines the transition from signal decay to signal recovery due to the refocussing  
 2 pulse,  $n$  is the point at which the signal is acquired and where  $0 \leq m \leq n$ . For ASE  $m =$   
 3  $(t_E - \tau) / 2 \Delta t$  and  $n = t_E / \Delta t$ , whilst for GESSE  $m = t_{SE} / 2 \Delta t$  and  $n = (t_{SE} + \tau) / \Delta t$ .  
 4 Here,  $t_E$  is defined as the timing of the centre of the readout and  $t_{SE}$  is the time at which the  
 5 spin echo forms (see Fig. 2). These definitions reflect an important distinction between the  
 6 ASE and GESSE pulse sequences, whereby  $t_E$  is fixed for ASE and variable for GESSE  
 7 whilst  $t_{SE}$  is variable for ASE and fixed for GESSE.

8 The phase evolution of  $P$  protons is then summed to simulate the decay of the  
 9 extravascular ASE or GESSE signal (Weisskoff et al., 1994),

$$S_{EV}(t_E, \tau) = \left| \frac{1}{P} \sum_{k=1}^P e^{i \phi(\tau)} \right| e^{-\frac{t_E}{T_{2,t}}} \quad (10)$$

10  
 11 where  $T_{2,t}$  is the underlying tissue  $T_2$ .

12 Intravascular signal has traditionally been difficult to simulate, with empirical  
 13 measurements of blood  $R_2$  and  $R_2^*$  commonly used (Griffeth and Buxton, 2011). However,  
 14 simulating the  $R_2'$ -weighted signal using the difference between  $R_2$  and  $R_2^*$  is likely to be  
 15 inaccurate in the short  $\tau$  regime. Recently an analytical model of the blood signal during a  
 16 Carr-Purcell Meiboom-Gill (CPMG) pulse sequence was extended to capture the signal  
 17 evolution between an arbitrary number of spin echoes (Berman and Pike, 2018), i.e. the  
 18 conditions that exist for ASE and GESSE pulse sequences. Using this model, the  
 19 intravascular signal,  $S_{IV}$ , is described by,

$$S_{IV}(t_E, \tau) = \exp \left\{ -\frac{\gamma^2}{2} G_0 \tau_D^2 \left[ \frac{t_E}{\tau_D} + \left( \frac{1}{4} + \frac{t_E}{\tau_D} \right)^{\frac{1}{2}} + \frac{3}{2} - 2 \left( \frac{1}{4} + \frac{t_E - t_{SE}/2}{\tau_D} \right)^{\frac{1}{2}} - 2 \left( \frac{1}{4} + \frac{t_{SE}/2}{\tau_D} \right)^{\frac{1}{2}} \right] \right\} \exp \left( -\frac{t_E}{T_{2,b|0}} \right). \quad (11)$$

1 Here  $\tau_D = R_{rbc}^2/D_b$ , where  $R_{rbc}$  is the characteristic size of red blood cells and  $D_b$  is the  
 2 diffusion coefficient of blood,  $T_{2,b|0}$  is the intrinsic  $T_2$  of blood (measured when the blood is  
 3 fully oxygenated) and  $G_0$  is the mean square field inhomogeneity in blood (Berman et al.,  
 4 2017),

$$G_0 = \frac{4}{45} Hct (1 - Hct) (4 \pi \Delta\chi (0.95 - Y) B_0)^2, \quad (12)$$

5 where the value of 0.95 represents the red blood cell oxygen saturation which is equal to the  
 6 susceptibility of plasma (Spees et al., 2001). The value of  $t_{SE}$  is fixed for GESSE but is  
 7 variable for ASE with  $t_{SE} = t_E - \tau$ . By definition  $t_E$  is fixed for ASE and varying for  
 8 GESSE.

9 Finally, the total signal,  $S_{TOT}$ , is calculated by taking a volume weighted sum of the  
 10 intra- and extravascular signals.

$$S_{TOT} = (1 - V_f) S_{EV} + V_f S_{IV} \quad (13)$$

11 It should be noted that if the simulated blood vessels contain deoxygenated blood then  $V_f$  is  
 12 equivalent to  $V_0$ , the deoxygenated blood volume.

13

## 14 **Methods**

15

### 16 Simulations

17 Simulations of the tissue signal were performed following the theory outlined above. Firstly,  
 18 extravascular signal decay was simulated using Monte Carlo simulations ( $B_0=3$  T,  
 19  $\gamma=267.5 \times 10^6$  rad  $s^{-1}$  T $^{-1}$ ). The radius of the spherical system of vessels,  $U$ , was chosen to

1 maintain a similar number of vessels,  $N$ , regardless of the vessel radius ( $N \sim 1,300$ ). For each  
2 proton, a complete random walk was generated with a step size,  $\Delta t$ , of 20  $\mu\text{s}$ , which was  
3 downsampled to 200  $\mu\text{s}$ , and  $D=1 \mu\text{m}^2\text{ms}^{-1}$  (Boxerman et al., 1995). The perpendicular  
4 distance,  $r_i$ , to each vessel in the system was then calculated. For protons that passed close to  
5 vessels, defined as  $R_c^2/r_i^2 > 0.04$ , the perpendicular distance was recalculated using the  
6 original 20  $\mu\text{s}$  time step to better sample the rapid magnetic field variation expected close to  
7 vessels (Dickson et al., 2010). Walks that moved the proton inside a vessel were flagged to be  
8 discarded in order to simulate non-permeable blood vessels, rather than reflecting the proton  
9 at the vessel surface which is less computationally efficient. This approach does not prevent  
10 protons passing close to vessels (as defined above) and due to the reduced time step used  
11 under this condition the spatial variation in the magnetic field is well sampled. The phase of  
12 each proton was allowed to evolve for 120 ms after the excitation with  $\Delta\chi=0.27$  ppm in CGS  
13 units (Spees et al., 2001). Phase accrual was stored for each proton in 2 ms intervals,  $\Delta t$ . A  
14 new system of vessels was generated for each proton and a total of 10,000 protons were  
15 simulated for each vessel radius investigated. However, the number of protons that passed  
16 within a vessel increased as vessel radius was reduced (26% at 5  $\mu\text{m}$  versus 3.1% at 1 mm at  
17  $V_f=3\%$ ). Therefore, only the first  $P=5,000$  protons that did not pass within a vessel were used  
18 to calculate  $S_{EV}$  using Eq. (10) with  $T_{2,r}=80$  ms. Secondly, intravascular signal decay was  
19 simulated using Eqs. (11) and (12), which are independent of vessel radius. Based on  
20 previous work the following parameters were used (Berman et al., 2017):  $T_{2,b|0}=189$  ms,  
21  $R_{rbc}=2.6 \mu\text{m}$  and  $D_b=2 \mu\text{m}^2\text{ms}^{-1}$ . The total signal was then calculated using Eq. (13).

22 Whilst the intravascular simulations are rapid to perform, Monte Carlo simulations of  
23 the extravascular signal are time consuming. Therefore, the following approaches were taken  
24 to accelerate these simulations, with examples presented as supplementary figures. We have  
25 previously shown that different oxygenation levels can be simulated by scaling the accrued

1 phase of a nominal oxygenation value by the target value (Blockley et al., 2008). This is  
2 made possible by saving the phase of each proton and the fact that phase is a linear function  
3 of blood oxygenation for a network of vessels with the same oxygenation (Fig. S1a).  
4 Different volume fractions can be simulated from the signal magnitude generated by Eq. (10).  
5 It has been shown that the extravascular signal,  $S_{EV}$ , can be described as a radius dependent  
6 shape function,  $f(R_c, \tau)$ , scaled by the volume fraction (Dickson et al., 2011; Kiselev and  
7 Posse, 1999) (Fig. S2a).

$$S_{EV}(R_c, \tau) = \exp[-V_f(R_c)f(R_c, \tau)] \quad (14)$$

8 It is also possible to simulate the effect of different rates of diffusion using the results of  
9 existing Monte Carlo simulations. Since the effect on the signal decay is dependent on the  
10 characteristic diffusion time,  $\tau_D$ , then Eq. (1) provides an alternative way of simulating a  
11 change in the diffusion coefficient. For example, the signal simulated from vessels with  $R_c=5$   
12  $\mu\text{m}$  and  $D=1 \mu\text{m}^2\text{ms}^{-1}$  is equivalent to the signal produced by simulations with  $R_c=7 \mu\text{m}$  and  
13  $D=2 \mu\text{m}^2\text{ms}^{-1}$  i.e. doubling  $D$  requires  $R_c$  to be increased by  $\sqrt{2}$  (Fig. S3a). Since the  
14 diffusion coefficient is expected to vary in the range  $0.78$  to  $1.09 \mu\text{m}^2\text{ms}^{-1}$  in cortical grey  
15 matter (Helenius et al., 2002), this is equivalent to between an 11.6% reduction and a 4.4%  
16 increase in vessel radius. As such, the diffusion coefficient wasn't varied in the following  
17 simulations, relying on variation in  $R_c$  to examine the range of characteristic diffusion times.

18 Finally, it is possible to simulate the effect of a system with multiple vessel radii by  
19 combining multiple single vessel radius simulations of the extravascular signal (Dickson et  
20 al., 2011; Kiselev and Posse, 1999). The resulting combined signal,  $S_{EV}^{MULTI}$ , can be calculated  
21 as the product of the signals of  $M$  single vessel simulations which have already been scaled  
22 for blood oxygenation and volume fraction as described above (Fig. S4a).

$$S_{EV}^{MULTI} = \prod_{k=1}^M S_{EV}(k) \quad (15)$$

1 The total signal including the contribution from intravascular blood can then be calculated  
 2 using Eq. (13). In this case the blood volume fraction is only equivalent to DBV when the  
 3 vessel distribution does not include fully oxygenated blood vessels.

4 When combined these acceleration approaches vastly reduce simulation time. The  
 5 average duration of a Monte Carlo simulation for a single vessel radius was 2 hrs 25 mins. In  
 6 contrast, scaling existing Monte Carlo results takes on the order of 100 ms. This enables new  
 7 investigations to be performed which were previously prohibitively time consuming.  
 8 Analysis of the fidelity of signals generated by scaling existing simulations versus direct  
 9 simulation showed that in general the percentage error  $((S^{simulated} - S^{scaled})/S^{simulated})$  is  
 10 less than 2% (Fig. S1b, S2b, S3b and S4b).

11

## 12 Parameter quantification

13 The following framework was used to quantify the parameters of the qBOLD model from the  
 14 simulated decay curves. The parameters of the SDR qBOLD model ( $R_2'$  and DBV) were  
 15 organised as a vector of unknowns ( $x$ ) in a linear system ( $A \cdot x = B$ ) (Stone et al., 2019). The  
 16 first row of the matrix  $A$  represents Eq. (3) when  $\tau=0$  with subsequent rows representing Eq.  
 17 (4) with values of  $\tau$  beyond the transition between the quadratic and linear exponential  
 18 regime. In this case only values of  $\tau$  greater than 15 ms were used to be consistent with  
 19 previous qBOLD experiments (Stone and Blockley, 2017). Vector  $B$  contains the ASE  
 20 signals,  $S(\tau)$ .

$$\begin{bmatrix} 0 & 0 & 1 \\ 1 & -\tau_1 & 1 \\ 1 & -\tau_2 & 1 \\ \vdots & \vdots & \vdots \\ 1 & -\tau_n & 1 \end{bmatrix} \begin{bmatrix} V_0 \\ R_2' \\ \log(S_0) - t_E \cdot R_2 \end{bmatrix} = \begin{bmatrix} \log(S(0)) \\ \log(S(\tau_1)) \\ \log(S(\tau_2)) \\ \vdots \\ \log(S(\tau_n)) \end{bmatrix} \quad (16)$$

1 Parameters were estimated via Eq. (16) using the least square solution, with the error in each  
2 parameter determined from the covariance matrix. Finally, OEF can be estimated by  
3 rearranging Eq. (2).

$$E_0 = \frac{3 \cdot R_2'}{4\pi \cdot \gamma B_0 \cdot \Delta\chi_0 \cdot Hct \cdot V_0} \quad (17)$$

4  
5 Effect of diffusion on ASE signal decay

6 Initial simulations were performed for a selection of vessel radii ( $R_c=5, 10, 50, 1000 \mu\text{m}$ ), a  
7 venous Y of 60%, a Hct of 40% and a DBV of 3%. Simulations of the ASE pulse sequence  
8 were performed with  $t_E=60 \text{ ms}$  and  $-60 \text{ ms} \leq \tau \leq 60 \text{ ms}$  for both extra- and intravascular  
9 signal, where  $\tau=60 \text{ ms}$  corresponds to pure gradient echo decay. For validation purposes,  
10 similar simulations were performed for the GESSE pulse sequence using  $t_{SE}=60 \text{ ms}$  and  $-30$   
11  $\text{ms} \leq \tau \leq 60 \text{ ms}$ . Hence a common  $t_E/t_{SE}$  was chosen to be consistent with previous  
12 simulations (Dickson et al., 2010).

13  
14 Effect of diffusion on qBOLD parameters

15 A further set of synthetic ASE signal decay curves were generated for vessel radii  
16 logarithmically spaced between 1 and 1,000  $\mu\text{m}$ . All other parameters were set consistent  
17 with previous experimental qBOLD measurements (Stone and Blockley, 2017). In the  
18 context of these simulations this required  $t_E=80 \text{ ms}$  with  $\tau=0$  and  $\tau=16$  to 64 ms in 4 ms steps  
19 ( $\Delta\tau$ ). The *apparent* value of  $R_2'$ , DBV and OEF were then estimated using Eq. (16) and (17).  
20 The effect of diffusion on the estimation of qBOLD parameters was investigated by first  
21 fixing OEF and varying DBV and then by fixing DBV and varying OEF. In the former case a  
22 fixed OEF of 40% was coupled with DBV values of 1, 3 and 5%, whilst in the latter case  
23 DBV was fixed at 3% and OEF took values of 20, 40 and 60%. These values are considered  
24 to be the *true* parameters in both cases. The results of varying DBV were also used to

1 consider the percentage error in DBV as a function of vessel radius i.e.  $(V_0^{apparent} -$   
2  $V_0^{true})/V_0^{true}$ . In these single vessel simulations arterial blood is assumed to have an oxygen  
3 saturation,  $Y$ , of 100% hence the venous oxygen saturation,  $Y_v = 1 - E_0$ .

4 The effect of intravascular signal on qBOLD parameter estimates was investigated by  
5 repeating these simulations, but excluding the intravascular compartment. In this way it was  
6 possible to quantify the percentage of the parameter estimate (PE) which results from the  
7 presence of intravascular signal i.e.  $(PE_{EV} - PE_{EV+IV})/PE_{EV+IV}$ .

8 Further investigation of the effect of diffusion on DBV estimates was pursued based  
9 on a consideration of Eq. (5), which suggests that errors must be due to either the signal  
10 measured at  $\tau=0$  ( $S_{meas}^S(0)$ ) or the extrapolated estimate of the signal at  $\tau=0$  from the  $R_2'$  fit  
11 ( $S_{extrap}^L(0)$ ), or both. However, given the analysis represented by Eq. (16),  $S_{extrap}^L(0)$  is not  
12 estimated and  $S_{meas}^S(0)$  is confounded by  $T_2$  decay. The latter was corrected by calculating  
13 the signal decay relative to the value at  $R=1,000 \mu\text{m}$ , where previous simulations would  
14 suggest the SDR applies and hence signal attenuation should be zero. The former was  
15 estimated by subtracting this relative measure of  $S_{meas}^S(0)$  from the estimated value of  
16 apparent DBV.

17

### 18 Effect of a physiologically realistic vessel radius distribution

19 The effect of a more physiologically realistic distribution of vessel radii was investigated by  
20 integrating the results from single radius simulations. A compartmental model of the  
21 vasculature derived from the morphology of the sheep brain was selected (Sharan et al.,  
22 1989). This model has five orders of arterial and venous vessels, with a range of radii, and a  
23 capillary compartment with a single vessel radius (Table 1). Additional Monte Carlo  
24 simulations for this range of vessel radii were performed and combined using the acceleration

1 techniques described above. Arterial vessels were assigned an arterial oxygen saturation,  $Y_a$ ,  
2 of 98%, which was used to calculate the venous saturation,  $Y_v$ , for a given OEF.

$$Y_v = Y_a(1 - E_0) \quad (18)$$

3 The capillary compartment was an intermediate oxygen saturation,  $Y_c$ , calculated as an  
4 average of the arterial and venous saturations weighted by a factor,  $\kappa$ , equal to 0.4  
5 representing a weighting towards the venous saturation (Griffeth and Buxton, 2011; Tsai et  
6 al., 2003).

$$Y_c = \kappa Y_a + (1 - \kappa) Y_v \quad (19)$$

7 Relative blood volume fractions for each vessel type were calculated by estimating the  
8 volume of each vessel radius population as cylinders with the properties described in Table 1.  
9 These relative blood volume fractions were then scaled by the total cerebral blood volume  
10 (CBV). Pairs of OEF and CBV values were drawn from a uniform random number generator  
11 within the following ranges: OEF 0-100%, CBV 0-10%. The qBOLD parameters were  
12 quantified for 1,000 random OEF-CBV pairs to examine the effect of diffusion across the  
13 physiological range. In the absence of a strict definition of DBV, the ground truth was  
14 assumed to be equal to the combined blood volume occupied by capillary and venous vessels.  
15 This is therefore only a working assumption, since it is likely the *true* DBV is weighted by  
16 blood oxygenation and vessel radius. Deoxyhaemoglobin content,  $dHb$ , was calculated based  
17 on the same assumption for DBV and a value for the density of brain tissue  $\rho=1.04$  g/ml  
18 (Rempp et al., 1994) using the following equation.

$$dHb = 100 \frac{V_0}{\rho} \frac{Hct}{0.03} E_0 \quad (20)$$

19 For comparison these simulations were also repeated for the original ASE based qBOLD  
20 implementation with  $t_E=64$  ms with  $\tau=0$  and  $\tau=10$  to 18 ms in 4 ms steps (An and Lin, 2003).

21 Details on how to access the simulation code, simulation results and analysis code  
22 that underlie this study can be found in Appendix A.



1

## 2 **Results**

3 Figure 3 presents simulations of the signal generated by the ASE pulse sequence in the  
4 absence of  $T_2$  decay and with an initial transverse magnetisation of one at  $t_E=0$ . The  
5 extravascular signal (Fig. 3a) was found to be symmetric with respect to the spin echo ( $\tau=0$ )  
6 regardless of vessel radius. Similarly, the intravascular signal (Fig. 3b) was symmetric, but  
7 displayed a relatively weak signal decay as a function of  $\tau$ . In contrast, simulations of the  
8 GESSE pulse sequence demonstrated increasing asymmetry with reducing vessel radius for  
9 the extravascular signal and strong asymmetry for the intravascular signal (Fig. S5).

10 Figure 4 displays the effect of vessel size on the parameter estimates from the SDR  
11 qBOLD model. The apparent values of  $R_2'$  plateau above a critical vessel radius of  
12 approximately  $40 \mu\text{m}$  (Fig. 4a,d) and are then consistent with predictions from the SDR  
13 qBOLD model (dashed lines calculated using Eq. (2)). The apparent DBV is found to be  
14 strongly dependent on vessel radius, peaking between  $20$  and  $30 \mu\text{m}$  (Fig. 4b,e). Estimates of  
15 the apparent OEF increase monotonically with vessel radius reaching the value predicted by  
16 the SDR qBOLD model as the vessel radius approaches  $1,000 \mu\text{m}$  (Fig. 4c,f). When the true  
17 OEF was fixed whilst DBV was varied (Fig. 4c) estimates of apparent OEF were consistent  
18 across DBV levels, suggesting that the error in DBV is a linear scale factor. Likewise, it can  
19 be seen that the profile of apparent DBV when the true DBV was fixed and OEF was varied  
20 (Fig. 4e) peak at different vessel radius values, suggesting that the error in DBV is OEF  
21 dependent. Furthermore, this effect can be seen to result in a reduced dynamic range for the  
22 estimates of apparent OEF as vessel size is reduced (Fig. 4f). Figure 5 confirms that the  
23 percentage error in DBV is constant for a given combination of OEF and vessel radius (Fig.  
24 5a), but differs for different OEF values (Fig. 5b). For reference, an increase in the value of

1 the diffusion coefficient would result in a linear translation to the right along the x-axis for  
2 data plotted against such a log vessel radius.

3 Figure 6 considers the contribution of intravascular signal to the parameter estimates  
4 in Fig. 4 as a function of vessel radius. This contribution is generally small for  $R_2'$  and DBV  
5 at around  $\pm 1\%$  for vessel radii greater than  $10 \mu\text{m}$ . However, the intravascular signal appears  
6 to reflect a larger contribution when OEF is low, conditions where qBOLD contrast is low.  
7 Despite this the effect of the intravascular signal appears to be largely cancelled in the  
8 estimation of OEF (Fig. 6c,f). A reproduction of Fig. 4 without intravascular signal is  
9 included in the supplementary material for comparison and shows little discernible difference  
10 by eye (Fig. S6).

11 Figure 7 investigates the origin of the DBV estimation error attributed either to an  
12 error in the measured signal at  $\tau=0$  (orange markers) or an error in the intercept extrapolated  
13 from long  $\tau$  data (green markers). In the case of the former,  $-\ln S_{meas}^S(0)$  is plotted such that  
14 the sum of the two curves representing the apparent DBV (represented by grey shading).  
15 When interpreting these curves, it is useful to consider the orange markers as a reflection of  
16 the deviation of the spin echo from perfect refocusing (with positive values representing  
17 increased signal attenuation) and the green markers as a reflection of the deviation of the  
18 measured  $R_2'$  from the SDR qBOLD estimate of  $R_2'$ . The former is found to be subject to  
19 increasing signal attenuation as vessel size is reduced, which is strongly affected by blood  
20 oxygenation via OEF. The latter is found to plateau and is relatively consistent with the SDR  
21 qBOLD model for vessel radii greater than approximately  $20 \mu\text{m}$ .

22 Figure 8 explores the combined effect of a distribution of vessel radii on parameter  
23 estimates from the SDR qBOLD model. The apparent  $R_2'$  is plotted against values of  $R_2'$   
24 predicted by the SDR model via Eq. (2), with DBV estimated according to the working  
25 assumption described above (Fig. 8a). Data points are colour coded to reflect the true voxel

1 deoxyhaemoglobin content in  $\text{ml}^{\text{dHb}}/100 \text{ g}^{\text{tissue}}$ . A linear dependence is maintained, albeit with  
2 a shallower gradient than predicted by the SDR qBOLD model. A large amount of  
3 uncertainty is observed in estimates of apparent DBV over the large physiological range  
4 tested (Fig. 8b), with data points colour coded by true OEF value. However, this level of  
5 uncertainty does not propagate into estimates of apparent OEF (Fig 8c) where data points are  
6 colour coded by true DBV. Apparent OEF increases monotonically between 0 and 50%, but  
7 reaches a plateau for higher values, and is inappropriately scaled compared with the true OEF  
8 i.e. the full range of OEF is represented by apparent OEF values between 16% and 25%. In a  
9 similar manner to Fig. 5, the percentage error in the apparent DBV can be plotted as a  
10 function of true OEF (Fig. 9). As noted for the single vessel radius simulations, this error is  
11 strongly OEF dependent.

12         These simulations were repeated for different ASE pulse sequence parameters,  
13 namely variations in  $t_E$  and  $\tau$ , and included in supplemental material. The results in Fig. S7  
14 largely mirror those in Fig. 8 with the following variations. The slope of the relationship  
15 between apparent  $R_2'$  and SDR qBOLD predicted  $R_2'$  is slightly reduced for the alternative  
16 parameters (Fig. S7a). More noticeable is the reduction in the range of apparent DBV values  
17 (Fig. S7b), with the error in the apparent DBV reduced by more than a half (Fig. S8). Whilst  
18 the apparent OEF is also inappropriately scaled, the relationship with true OEF is more  
19 monotonic in nature.

20

## 21 **Discussion**

22 In this study numerical simulations were used to investigate the effect of diffusion on ASE  
23 based qBOLD measurements and the origin of DBV overestimation in such measurements. In  
24 contrast to the previously observed shift of the GESSE signal maximum due to the effect of  
25 diffusion, the ASE signal was observed to maintain its symmetry as vessel radius is reduced

1 and the effect of diffusion is increased. Two hypotheses for the origin of the observed DBV  
2 overestimation were tested: (i) the effect of intravascular blood signal and (ii) the effect of  
3 diffusion on the extravascular tissue signal. The presence of intravascular blood signal was  
4 found to have a minor effect on qBOLD parameter estimates. It is therefore unlikely to be  
5 responsible for the majority of the overestimation observed in DBV measurements. In  
6 contrast, the extravascular signal was shown to have a very strong dependence on vessel  
7 radius providing the potential for a large error in DBV and is considered to be the dominant  
8 cause of DBV overestimation. Furthermore, the error in DBV is predicted to be blood oxygen  
9 saturation level dependent. Integration of these single vessel radius simulations via a more  
10 physiologically realistic vessel distribution revealed three main findings. Firstly, that the  
11 relationship between the apparent  $R_2'$  and deoxyhaemoglobin content is retained. Secondly,  
12 there is an inherent uncertainty in estimates of DBV. Finally, this uncertainty is not  
13 propagated to apparent OEF estimates, but results in inappropriate scaling of these estimates.  
14 Furthermore, the monotonic behaviour of the relationship between apparent and true OEF  
15 was found to be dependent on the pulse sequence parameters  $t_E$  and  $\tau$ . These results provide  
16 new directions for improving the modelling of ASE qBOLD signal and the reduction of  
17 systematic error in parameter estimates of OEF and DBV.

18

### 19 Effect of diffusion on ASE measurements

20 Whilst several studies have investigated the qBOLD signal as acquired by the GESSE pulse  
21 sequence (Christen et al., 2014; Dickson et al., 2011, 2010; Pannetier et al., 2014), this study  
22 considered whether the signal decay under an ASE acquisition behaves in the same way. One  
23 particular characteristic of the GESSE pulse sequence concerns the maximum of the qBOLD  
24 signal decay curve. This would ordinarily be expected to coincide with the spin echo ( $\tau=0$ ),  
25 but has been shown to be shifted towards negative  $\tau$  values (Fig. S5a) for the GESSE

1 sequence in the presence of diffusion (Dickson et al., 2010; Pannetier et al., 2014). However,  
2 this effect is not observed in simulations of the extravascular signal acquired using an ASE  
3 pulse sequence (Fig. 3a), where the signal maximum was found to be close to the spin echo  
4 ( $\tau=0$ ). However, the GESSE and ASE sequences differ in an important way. The  $t_E$  of each  
5 successive  $\tau$  value increases in the GESSE experiment and hence the time for protons to  
6 diffuse around blood vessels increases. Whilst the  $t_E$  is constant for all  $\tau$  values in the ASE  
7 method and hence the time for diffusion is also constant. This would suggest that there is a  $t_E$   
8 dependent component of the  $R_2'$ -weighted signal decay. Such a component has previously  
9 been included as a correction to estimates of  $R_2'$  (Berman et al., 2017).

10 This study also considered the  $R_2'$ -weighted contribution of the blood to the qBOLD  
11 signal using a recently proposed model (Berman and Pike, 2018). In common with the  
12 extravascular results, the ASE blood signal is symmetric with respect to the spin echo, but  
13 decays far less as a function of  $\tau$  (Fig. 3b). However, the signal is heavily attenuated at all  $\tau$   
14 values compared with the extravascular simulations. This is in contrast to simulations of the  
15 GESSE blood signal, which are highly shifted to negative  $\tau$  values and present largely as an  
16 exponential decay (Fig. S5b).

17

### 18 Origin of DBV overestimation

19 Simulations of the combined intravascular and extravascular signal revealed a vessel radius  
20 dependent overestimation of DBV for vessel radii greater than 5  $\mu\text{m}$  (Fig. 4b,e). The error in  
21 the apparent DBV was found to be OEF dependent (Fig. 5). However, at larger radii  
22 (approaching 1 mm) estimates of DBV were consistent with ground truth values. The  
23 contribution of intravascular signal to these parameter estimates was determined by  
24 comparing simulations with (Fig. 4) and without (Fig. S6) an intravascular compartment. A  
25 small and largely vessel radius independent effect (for  $R_c > 10 \mu\text{m}$ ) was observed (Fig. 6b,e).

1 The effect of intravascular signal was more pronounced for smaller vessel radii and low OEF,  
2 where the relative contribution of intravascular signal is increased by weak extravascular  
3 contrast. Despite this, the overestimation of DBV is dominated by the effect of diffusion on  
4 the extravascular signal.

5 Finally, Eq. (4) provides the opportunity to consider whether the systematic error in  
6 DBV originates in the measurement of the spin echo ( $S_{meas}^S(0)$ ), the intercept extrapolated  
7 from the long  $\tau$  regime ( $S_{extrap}^L(0)$ ) or a combination of both, as explored in Fig. 7. For  
8 vessel radii greater than 20  $\mu\text{m}$  additional signal attenuation of  $S_{meas}^S(0)$  is the main driver of  
9 overestimation of DBV. However, for vessels with radii below 20  $\mu\text{m}$ , errors in  $S_{extrap}^L(0)$   
10 provide an additional confound to DBV estimation. These results are consistent with the  
11 characteristics of gradient echo versus spin echo BOLD vessel size sensitivity, which  
12 correspond to  $\ln S_{extrap}^L(0)$  and  $\ln S_{meas}^S(0)$ , respectively (Boxerman et al., 1995). For the  
13 smallest vessel radii the apparent  $R_2'$  is reduced relative to the value expected by the SDR  
14 qBOLD model (Fig. 4a,d) due to diffusional narrowing, such that  $\ln S_{extrap}^L(0)$  is also  
15 reduced (Fig. 7). Similarly, additional unrecoverable signal decay due to diffusion narrowing  
16 results in a decrease in the value of  $\ln S_{meas}^S(0)$ , which is analogous to an increase in  
17 apparent  $R_2$  and is strongest for capillary sized vessels (Note that Fig. 7 plots  $-\ln S_{meas}^S(0)$ ).  
18 With increasing vessel radius,  $R_2'$  approaches the SDR qBOLD model prediction and the  
19 value of  $\ln S_{extrap}^L(0)$  approaches a constant value. Similarly the attenuation of the spin echo  
20 is reduced as the SDR is approached and  $\ln S_{meas}^S(0)$  reaches its minimum. Therefore, when  
21 the differing profiles of these phenomena are combined the form of the apparent DBV as a  
22 function of vessel radius can be described.

23

24 Effect of a physiological vessel radius distribution

1 Having established the vessel radius dependence of the qBOLD signal, the implications for  
2 experimental measurements were considered. In order to integrate the single vessel radius  
3 results, a vessel distribution with a small number of discrete vessel radii was selected. This  
4 enabled different oxygenation levels to be associated with different vessel types. A wide  
5 physiological range was investigated by randomly selecting pairs of OEF and CBV values.  
6 The apparent  $R_2'$  was found to be tightly correlated with the  $R_2'$  predicted by SDR qBOLD  
7 model (Fig. 8a). This is important as it demonstrates that the relationship between  $R_2'$  and the  
8 voxel deoxyhaemoglobin content (proportional to the product of deoxyhaemoglobin  
9 concentration and DBV) is maintained despite the effects of diffusion. It should therefore be  
10 possible to quantify maps of  $R_2'$  in terms of deoxyhaemoglobin content with appropriate  
11 scaling. Likewise with improved quantification of DBV, either through improvements to the  
12 qBOLD technique or via an additional experimental technique (Blockley et al., 2013; Lee et  
13 al., 2018), accurate measurements of OEF are possible. A large amount of uncertainty was  
14 observed in the apparent DBV (Fig. 8b). This was demonstrated to be blood oxygenation  
15 dependent i.e. a function of OEF (Fig. 9). This is consistent with the results of the single  
16 vessel simulations (Fig. 5) and demonstrates the important contribution of smaller vessel  
17 radii. This also explains why this uncertainty does not propagate into the apparent OEF, since  
18 the percentage error in apparent DBV is constant at each OEF level (Fig. 8c). However, the  
19 increasing percentage error in apparent DBV with OEF (Fig. 9) results in a progressive  
20 underestimation of apparent OEF. A plateau in the apparent OEF limits the maximum  
21 measured OEF to approximately 50%. Despite this the remaining range covers the majority  
22 of the expected healthy physiological range (Marchal et al., 1992). These simulation were  
23 repeated for an alternative set of ASE pulse sequence parameters, replicating the effects  
24 observed for  $R_2'$  and DBV (Fig S7a,b and Fig. S8). A monotonic relationship between  
25 apparent and true DBV was revealed and although the linear portion is limited to the range

1 between 20% and 80% this encompasses the range reported in ischaemic stroke lesions  
2 defined using diffusion weighted imaging (Guadagno et al., 2006). The underlying  
3 mechanisms for this altered behaviour are inherently multidimensional and require further  
4 systematic investigation. However, these results demonstrate that there is additional scope for  
5 optimisation of qBOLD through changes to  $t_E$  and the range of  $\tau$  values.

6 Finally, the results of these multi-radius simulations appear to be consistent with  
7 previous measurements of  $OEF=21\pm 2\%$  and  $DBV=3.6\pm 0.4\%$  (Stone and Blockley, 2017).  
8 Under the assumption that a true OEF of 40% is healthy, Fig. 8 would predict an apparent  
9 OEF of 24%. Likewise Fig. 9 would predict the percentage error in the apparent DBV is  
10 100%, which would reduce the measured value above to 1.8%. This would bring these  
11 measurements in line with other MR based measurements of DBV at 1.75% (He and  
12 Yablonskiy, 2007) and venous CBV at 2.2% (Blockley et al., 2013). For the alternative ASE  
13 pulse sequence parameters Fig. S7 predicts an apparent OEF of 40% for a true OEF value of  
14 40%, which is consistent with experiments (An and Lin, 2003). However, Fig. S7 also  
15 predicts that the dynamic range of OEF is compressed, suggesting that modulations of OEF  
16 with respect to this baseline would be underestimated.

17

## 18 Limitations

19 Whilst the simulation methodology used in this study has identified some limitations of the  
20 current implementation of ASE based qBOLD, it also offers an opportunity to optimise future  
21 implementations. Further simulations could be used to identify optimal values of  $t_E$  and  $\tau$   
22 which maximise the linearity of the relationship between apparent OEF and the ground truth.  
23 They could also be used to estimate a more appropriate scale factor for OEF estimation by  
24 treating the  $\frac{4}{3}\pi$  geometry factor in Eq. (2) as an arbitrary scale factor. Such an approach has  
25 previously been used in calibrated BOLD to great effect (Griffeth and Buxton, 2011).



1           The results of this study rely on a detailed model of the qBOLD signal. However, in  
2 this implementation it only accounts for the intra- and extravascular signal contributions of a  
3 single distribution of blood vessels in grey matter. Whilst this two compartment model was  
4 sufficient to investigate the origin of DBV overestimation in ASE based qBOLD, a more  
5 realistic model might include the signal contributions of cerebral spinal fluid (Dickson et al.,  
6 2009), the myelin in white matter (Bouvier et al., 2013), desaturated arterial blood vessels  
7 (Boas et al., 2008), the effect of iron deposition (Wisner et al., 1988) or different vessel  
8 radius distributions (Germuska et al., 2013; Lauwers et al., 2008). As such these  
9 contributions to the qBOLD signal may also provide fertile ground for future exploration.

10           In addition, this study did not consider the effects of magnetic field inhomogeneity or  
11 noise on the measured signal. The former has been extensively studied experimentally  
12 (Blockley and Stone, 2016; Dickson et al., 2010; Yablonskiy, 1998), but may benefit from  
13 more detailed simulations to test the assumptions of these correction schemes. The latter  
14 poses a particular problem for the analysis approach described by Eq. (16) and (17), is reliant  
15 on a single measurement in the short  $\tau$  regime acquired at the spin echo. A broader range of  
16 measurements in the short  $\tau$  regime could be incorporated into the analysis using a non-linear  
17 model fitting approach based on Eq. (3) and (4), which may also result in reduced uncertainty  
18 in parameter estimates. Further improvements could be achieved by using a more  
19 sophisticated analysis approach, such as a Bayesian framework which would enable prior  
20 knowledge about physiological parameters to be incorporated (Chappell et al., 2008). Finally,  
21 this study has demonstrated that by altering the ASE acquisition parameters it is possible to  
22 address some of the limitations of our existing experimental approach. Optimisation of these  
23 parameters will form the focus of future work.

24

25   **Conclusion**

1 The ASE qBOLD signal decay was found to be symmetric with respect to the spin echo, in  
2 contrast to previous simulation of the GESSE pulse sequence. Overestimation of DBV by  
3 ASE based qBOLD was found to be dominated by the effect of diffusion on extravascular  
4 signal decay, with the presence of intravascular blood signal having only a small  
5 contribution. Integrating the results of single vessel simulations using an *in vivo* distribution  
6 of vessel radii revealed several limitations of current measurements and provides a  
7 foundation for future optimisation of ASE based qBOLD acquisitions.

8

### 9 **Acknowledgements**

10 This work was supported by the Engineering and Physical Sciences Research Council [grant  
11 number EP/K025716/1]. The Wellcome Centre for Integrative Neuroimaging is supported by  
12 core funding from the Wellcome Trust [grant 203139/Z/16/Z].

13

### 14 **Appendix A**

15 The results of the simulations performed in this study can be accessed via the Oxford  
16 University Research Archive, doi: <https://doi.org/10.5287/bodleian:mvPY99a9D>.  
17 Furthermore, the code used to generate these simulation results and to analyse experimental  
18 data can be downloaded from the Zenodo repository, doi:  
19 <https://doi.org/10.5281/zenodo.3241420>. Supplementary data related to this article can be  
20 found at <DOI>.

21

### 22 **References**

23 An, H., Lin, W., 2003. Impact of intravascular signal on quantitative measures of cerebral  
24 oxygen extraction and blood volume under normo- and hypercapnic conditions using an  
25 asymmetric spin echo approach. *Magn. Reson. Med.* 50, 708–716.

- 1 An, H., Lin, W., 2000. Quantitative measurements of cerebral blood oxygen saturation using  
2 magnetic resonance imaging. *J. Cereb. Blood Flow Metab.* 20, 1225–1236.
- 3 Astrup, J., Siesjö, B.K., Symon, L., 1981. Thresholds in cerebral ischemia - the ischemic  
4 penumbra. *Stroke* 12, 723–725.
- 5 Berman, A.J.L., Mazerolle, E.L., MacDonald, M.E., Blockley, N.P., Luh, W.M., Pike, G.B.,  
6 2017. Gas-free calibrated fMRI with a correction for vessel-size sensitivity. *Neuroimage*  
7 169, 176–188.
- 8 Berman, A.J.L., Pike, G.B., 2018. Transverse signal decay under the weak field  
9 approximation: Theory and validation. *Magn. Reson. Med.* 80, 341–350.  
10 <https://doi.org/10.1002/mrm.27035>
- 11 Blockley, N.P., Griffeth, V.E.M., Germuska, M.A., Bulte, D.P., Buxton, R.B., 2013. An  
12 analysis of the use of hyperoxia for measuring venous cerebral blood volume:  
13 Comparison of the existing method with a new analysis approach. *Neuroimage* 72, 33–  
14 40.
- 15 Blockley, N.P., Jiang, L., Gardener, A.G., Ludman, C.N., Francis, S.T., Gowland, P.A., 2008.  
16 Field strength dependence of R1 and R2\* relaxivities of human whole blood to  
17 proance, vasovist, and deoxyhemoglobin. *Magn. Reson. Med.* 60, 1313–1320.
- 18 Blockley, N.P., Stone, A.J., 2016. Improving the specificity of R2' to the deoxyhaemoglobin  
19 content of brain tissue: Prospective correction of macroscopic magnetic field gradients.  
20 *Neuroimage* 135, 253–260.
- 21 Boas, D.A., Jones, S.R., Devor, A., Huppert, T.J., Dale, A.M., 2008. A vascular anatomical  
22 network model of the spatio-temporal response to brain activation. *Neuroimage* 40,  
23 1116–1129.
- 24 Bouvier, J., Castellani, S., Debacker, C., Pannetier, N., Tropès, I., Krainik, A., Barbier, E.L.,  
25 2013. Evaluation of multiparametric qBOLD in white matter: a simulation study, in:

- 1 Proc. Intl. Soc. Mag. Reson. Med. . p. 1.
- 2 Boxerman, J.L., Hamberg, L.M., Rosen, B.R., Weisskoff, R.M., 1995. MR contrast due to  
3 intravascular magnetic susceptibility perturbations. *Magn. Reson. Med.* 34, 555–566.
- 4 Chappell, M.A., Groves, A.R., Whitcher, B., Woolrich, M.W., 2008. Variational Bayesian  
5 Inference for a Nonlinear Forward Model. *IEEE Trans. Signal Process.* 57, 223–236.
- 6 Christen, T., Pannetier, N.A., Ni, W.W., Qiu, D., Moseley, M.E., Schuff, N., Zaharchuk, G.,  
7 2014. MR vascular fingerprinting: A new approach to compute cerebral blood volume,  
8 mean vessel radius, and oxygenation maps in the human brain. *Neuroimage* 89, 262–  
9 270.
- 10 Dickson, J.D., Ash, T.W.J., Williams, G.B., Harding, S.G., Carpenter, T.A., Menon, D.K.,  
11 Ansoerge, R.E., 2010. Quantitative BOLD: the effect of diffusion. *J. Magn. Reson.*  
12 *Imaging* 32, 953–961.
- 13 Dickson, J.D., Ash, T.W.J., Williams, G.B., Sukstanskii, A.L., Ansoerge, R.E., Yablonskiy,  
14 D.A., 2011. Quantitative phenomenological model of the BOLD contrast mechanism. *J.*  
15 *Magn. Reson.* 212, 17–25.
- 16 Dickson, J.D., Williams, G.B., Harding, S.G., Carpenter, T.A., Ansoerge, R.E., 2009. Nulling  
17 the CSF Signal in Quantitative fMRI, in: *Proc. Intl. Soc. Mag. Reson. Med.* 17. p. 1640.
- 18 Germuska, M.A., Meakin, J.A., Bulte, D.P., 2013. The influence of noise on BOLD-mediated  
19 vessel size imaging analysis methods. *J. Cereb. Blood Flow Metab.* 33, 1857–1863.
- 20 Griffeth, V.E.M., Buxton, R.B., 2011. A theoretical framework for estimating cerebral  
21 oxygen metabolism changes using the calibrated-BOLD method: Modeling the effects  
22 of blood volume distribution, hematocrit, oxygen extraction fraction, and tissue signal  
23 properties on the BOLD signal. *Neuroimage* 58, 198–212.
- 24 Guadagno, J. V, Warburton, E.A., Jones, P.S., Day, D.J., Aigbirhio, F.I., Fryer, T.D.,  
25 Harding, S., Price, C.J., Green, H.A., Barret, O., Gillard, J.H., Baron, J.C., 2006. How

- 1 affected is oxygen metabolism in DWI lesions?: A combined acute stroke PET-MR  
2 study. *Neurology* 67, 824–829.
- 3 He, X., Yablonskiy, D.A., 2007. Quantitative BOLD: Mapping of human cerebral  
4 deoxygenated blood volume and oxygen extraction fraction: Default state. *Magn. Reson.*  
5 *Med.* 57, 115–126.
- 6 Helenius, J., Soenne, L., Perkiö, J., Salonen, O., Kangasmäki, A., Kaste, M., Carano, R.A.D.,  
7 Aronen, H.J., Tatlisumak, T., 2002. Diffusion-weighted MR imaging in normal human  
8 brains in various age groups. *Am. J. Neuroradiol.* 23, 194–199.
- 9 Kety, S.S., Schmidt, C.F., 1948. The nitrous oxide method for the quantitative determination  
10 of cerebral blood flow in man: Theory, procedure and normal values. *J. Clin. Invest.* 27,  
11 476–483.
- 12 Kiselev, V.G., Posse, S., 1999. Analytical model of susceptibility-induced MR signal  
13 dephasing: effect of diffusion in a microvascular network. *Magn. Reson. Med.* 41, 499–  
14 509.
- 15 Lauwers, F., Cassot, F., Lauwers-Cances, V., Puwanarajah, P., Duvernoy, H., 2008.  
16 Morphometry of the human cerebral cortex microcirculation: General characteristics and  
17 space-related profiles. *Neuroimage* 39, 936–948.
- 18 Lee, H., Englund, E.K., Wehrli, F.W., 2018. Interleaved quantitative BOLD : Combining  
19 extravascular  $R_2'$  - and intravascular  $R_2$  -measurements for estimation of  
20 deoxygenated blood volume and hemoglobin oxygen saturation. *Neuroimage* 174, 420–  
21 431. <https://doi.org/10.1016/j.neuroimage.2018.03.043>
- 22 Marchal, G., Rioux, P., Petit-Taboué, M.C., Sette, G., Travère, J.M., Le Poec, C.,  
23 Courtheoux, P., Derlon, J.M., Baron, J.C., 1992. Regional cerebral oxygen consumption,  
24 blood flow, and blood volume in healthy human aging. *Arch. Neurol.* 49, 1013–1020.
- 25 Muller, M.E., 1959. A note on a method for generating points uniformly on n -dimensional

- 1 spheres. *Commun. ACM* 2, 19–20.
- 2 Pannetier, N.A., Sohlin, M., Christen, T., Schad, L., Schuff, N., 2014. Numerical modeling of  
3 susceptibility-related MR signal dephasing with vessel size measurement: phantom  
4 validation at 3T. *Magn. Reson. Med.* 72, 646–658.
- 5 Rempp, K.A., Brix, G., Wenz, F., Becker, C.R., Gückel, F., Lorenz, W.J., 1994.  
6 Quantification of regional cerebral blood flow and volume with dynamic susceptibility  
7 contrast-enhanced MR imaging. *Radiology* 193, 637–641.
- 8 Sharan, M., Jones, M.D., Koehler, R.C., Traystman, R.J., Popel, A.S., 1989. A  
9 compartmental model for oxygen transport in brain microcirculation. *Ann. Biomed.*  
10 *Eng.* 17, 13–38.
- 11 Spees, W.M., Yablonskiy, D.A., Oswood, M.C., Ackerman, J.J., 2001. Water proton MR  
12 properties of human blood at 1.5 Tesla: magnetic susceptibility, T1, T2, T2\*, and non-  
13 Lorentzian signal behavior. *Magn. Reson. Med.* 45, 533–542.
- 14 Stone, A.J., Blockley, N.P., 2017. A streamlined acquisition for mapping baseline brain  
15 oxygenation using quantitative BOLD. *Neuroimage* 147, 79–88.
- 16 Stone, A.J., Harston, G.W.J., Carone, D., Okell, T.W., Kennedy, J., Blockley, N.P., 2019.  
17 Prospects for investigating brain oxygenation in acute stroke: Experience with a non-  
18 contrast quantitative BOLD based approach. *Hum. Brain Mapp.* 40, 2853–2866.  
19 <https://doi.org/10.1002/hbm.24564>
- 20 Tsai, A.G., Johnson, P.C., Intaglietta, M., 2003. Oxygen gradients in the microcirculation.  
21 *Physiol. Rev.* 83, 933–963.
- 22 Weisskoff, R.M., Zuo, C.S., Boxerman, J.L., Rosen, B.R., 1994. Microscopic susceptibility  
23 variation and transverse relaxation: theory and experiment. *Magn. Reson. Med.* 31, 601–  
24 610.
- 25 Wismer, G.L., Buxton, R.B., Rosen, B.R., Fisel, C.R., Oot, R.F., Brady, T.J., Davis, K.R.,

- 1           1988. Susceptibility induced MR line broadening: applications to brain iron mapping. *J.*
- 2           *Comput. Assist. Tomogr.* 12, 259–265.
- 3   Yablonskiy, D.A., 1998. Quantitation of intrinsic magnetic susceptibility-related effects in a
- 4           tissue matrix. Phantom study. *Magn. Reson. Med.* 39, 417–428.
- 5   Yablonskiy, D.A., Haacke, E.M., 1994. Theory of NMR signal behavior in magnetically
- 6           inhomogeneous tissues: the static dephasing regime. *Magn. Reson. Med.* 32, 749–763.
- 7

## Tables

**Table 1.** Vascular compartment model described by (Sharan et al., 1989). Radius, length and number of vessels were used to calculate the relative volume fractions for each compartment with and without arteriolar vessels.

|                                                   | Arterioles |                   |                    |                    |                    | Capillary          |                    | Venules            |                    |                   |      |
|---------------------------------------------------|------------|-------------------|--------------------|--------------------|--------------------|--------------------|--------------------|--------------------|--------------------|-------------------|------|
|                                                   | a1         | a2                | a3                 | a4                 | a5                 | c                  | v5                 | v4                 | v3                 | v2                | v1   |
| Radius ( $\mu\text{m}$ )                          | 60         | 30                | 15                 | 10                 | 5                  | 2.8                | 7.5                | 15                 | 22.5               | 45                | 90   |
| Length ( $\mu\text{m}$ )                          | 5390       | 2690              | 1350               | 900                | 450                | 600                | 450                | 900                | 1350               | 2690              | 5390 |
| Number of vessels                                 | 1880       | $1.5 \times 10^4$ | $1.15 \times 10^5$ | $3.92 \times 10^5$ | $3.01 \times 10^6$ | $5.92 \times 10^7$ | $3.01 \times 10^6$ | $3.92 \times 10^5$ | $1.15 \times 10^5$ | $1.5 \times 10^4$ | 1880 |
| Relative vol. frac. (%)<br>(all vessel types)     | 4.3        | 4.3               | 4.1                | 4.1                | 4.0                | 32.6               | 8.9                | 9.3                | 9.2                | 9.6               | 9.6  |
| Relative vol. frac. (%)<br>(excluding arterioles) |            |                   |                    |                    |                    | 41.2               | 11.3               | 11.7               | 11.6               | 12.1              | 12.1 |



## Figures

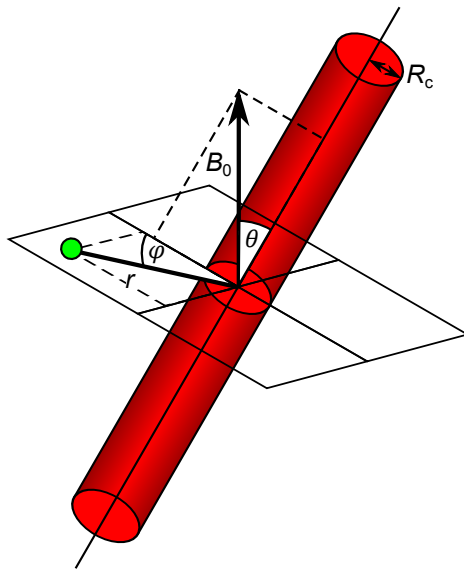

**Fig. 1.** Blood vessels are approximated as infinitely long cylinders at an angle  $\theta$  with respect to  $B_0$ , the main magnetic field. The proton location is defined to be on a plane orthogonal to the blood vessel at a perpendicular distance  $r$  and an angle  $\phi$  with respect to the projection of  $B_0$  onto the plane.

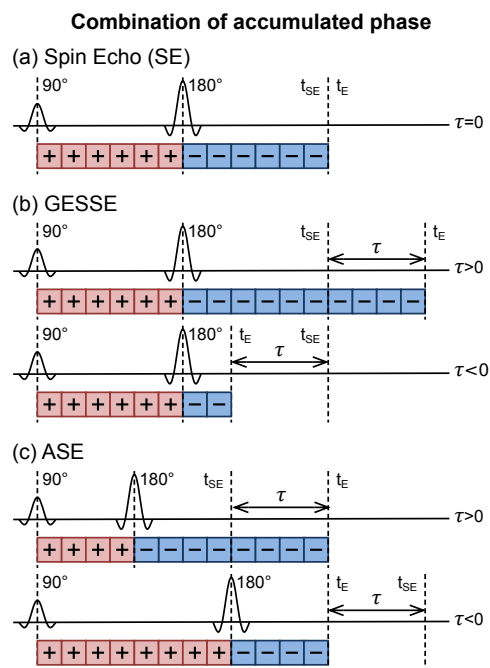

**Fig. 2.** By combining the phases generated by the Monte Carlo simulations different pulse sequences can be simulated. The cumulative sum of the phase accumulated after the  $180^\circ$  refocussing pulse is subtracted from the cumulative sum of the phases accumulated prior to the refocussing pulse. In a standard spin echo pulse sequence (a) the refocussing pulse is placed midway between the  $90^\circ$  excitation pulse and the echo time ( $t_E$ ), which is equal to the spin echo time ( $t_{SE}$ ). The GESSE pulse sequence (b) introduces  $R_2'$ -weighting through the parameter  $\tau$  by altering  $t_E$ , whilst keeping  $t_{SE}$  constant. Note: each value of  $\tau$  is acquired at a different  $t_E$ . The ASE sequence (c) introduces  $R_2'$ -weighting by shifting the refocussing pulse by a time  $\tau/2$  leading to a change in  $t_{SE}$ , although  $t_E$  is kept constant. By convention positive values of  $\tau$  occur when the  $t_E > t_{SE}$  and negative values occur when  $t_E < t_{SE}$ .

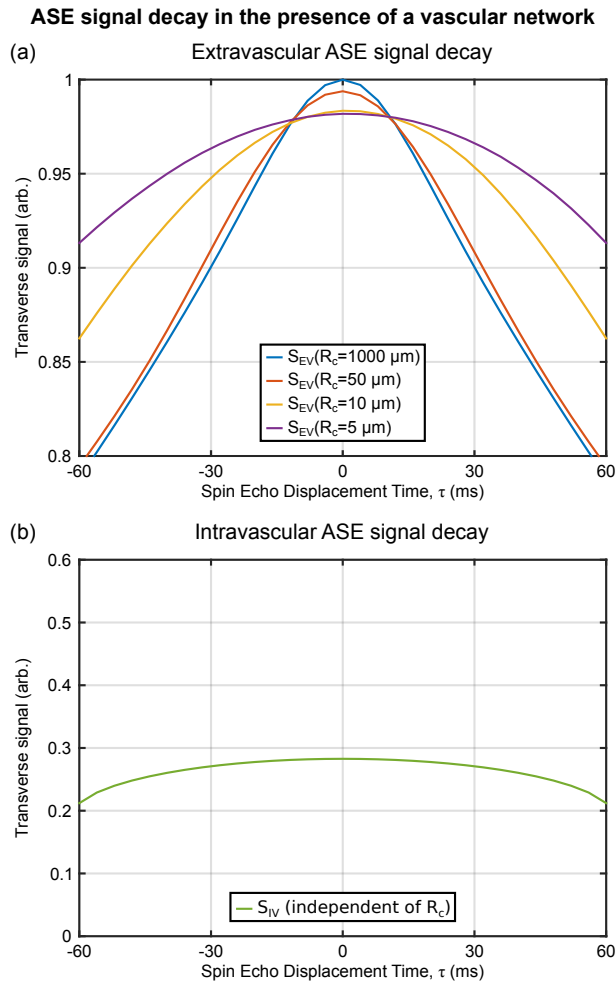

**Fig. 3.** Examples of the signal decay from the ASE pulse sequence as a function of vessel radius ( $Y=60\%$ ,  $V_0=3\%$ ,  $Hct=40\%$ ). (a) The extravascular signal ( $S_{EV}$ ) decay is observed to be symmetric with respect to  $\tau=0$  regardless of vessel radius. Signal attenuation at  $\tau=0$  increases as vessel radius decreases due to the increased effect of diffusion. (b) The intravascular signal ( $S_{IV}$ ) decay shows considerable signal attenuation which is symmetric and varies weakly with  $\tau$ .

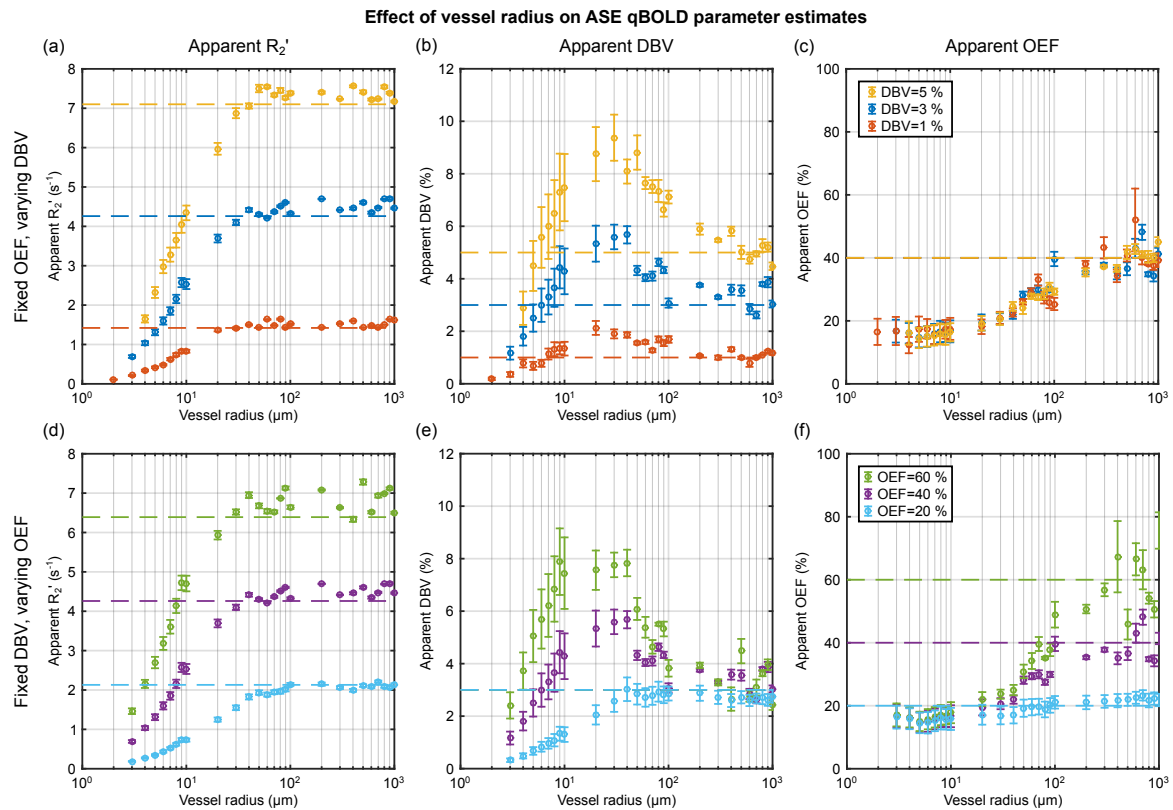

**Fig. 4.** Investigation of the effect of vessel radius on the parameter estimates derived from ASE based qBOLD. Simulations were first performed with a fixed OEF ( $E_0=40\%$ ) and three DBV values (top) then with a fixed DBV ( $V_0=3\%$ ) and three values of OEF (bottom). The apparent  $R_2'$  (left) is estimated for each OEF-DBV pair and presented alongside the  $R_2'$  values predicted by the SDR qBOLD model (dashed lines). Likewise, the apparent DBV (centre) and apparent OEF (right) are presented alongside the true DBV and OEF (dashed lines).

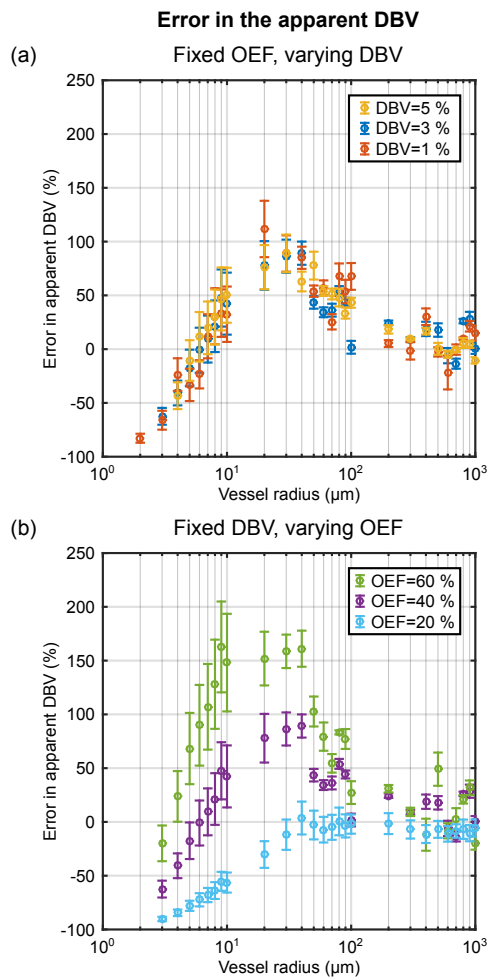

**Fig. 5.** Estimation of the percentage error in DBV at each of the three simulated values with (a) fixed  $E_0=40\%$ , varying DBV and (b) fixed  $V_0=3\%$ , varying  $E_0$ . The largest error is observed for vessels between 10 and 100  $\mu\text{m}$  and is smallest as vessel size approaches 1 mm. The magnitude of the error is also dependent on OEF. The percentage error was calculated as

$$(V_0^{\text{apparent}} - V_0^{\text{true}})/V_0^{\text{true}}.$$

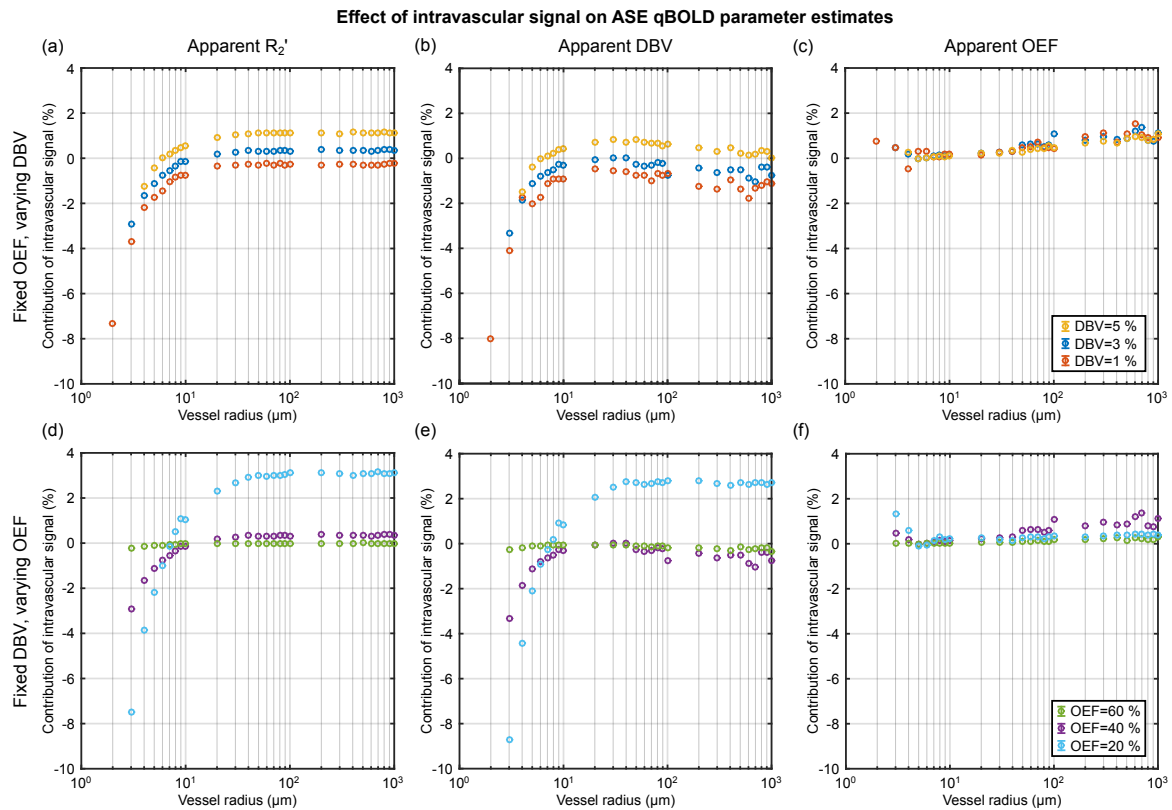

**Fig. 6.** Investigation of the contribution of intravascular signal to qBOLD parameter estimates (PE) presented in Fig. 3. This contribution was quantified as the percentage difference between PEs simulated with and without intravascular signal i.e.  $(PE_{EV} - PE_{EV+IV})/PE_{EV+IV}$ . The contribution of intravascular signal is observed to be relatively small for all parameters. Extravascular only PE results can be found in supplementary materials (Fig. S6).

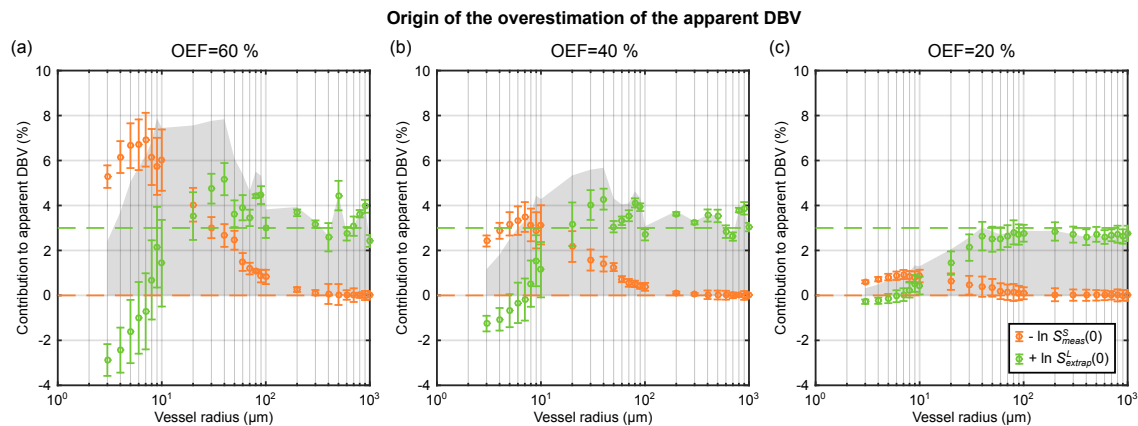

**Fig. 7.** Investigation of the origin of the overestimation of the measured DBV for three different OEF values; (a)  $E_0=60\%$ , (b)  $E_0=40\%$ , (c)  $E_0=20\%$  (true  $V_0=3\%$ ). The orange markers represent the natural log of the measured signal at  $\tau=0$ , plotted here as  $-\ln S_{meas}^S(0)$ , displaying increasing signal attenuation with decreasing vessel radius. Whilst the green markers represent the log of the intercept extrapolated from long  $\tau$  data points ( $\ln S_{extrap}^L(0)$ ) and appears more stable in the face of a reduced vessel radius. The sum of these curves is the apparent DBV as in Fig. 4 and represented here by the grey shaded area. Dashed lines display the prediction made by the SDR qBOLD model.

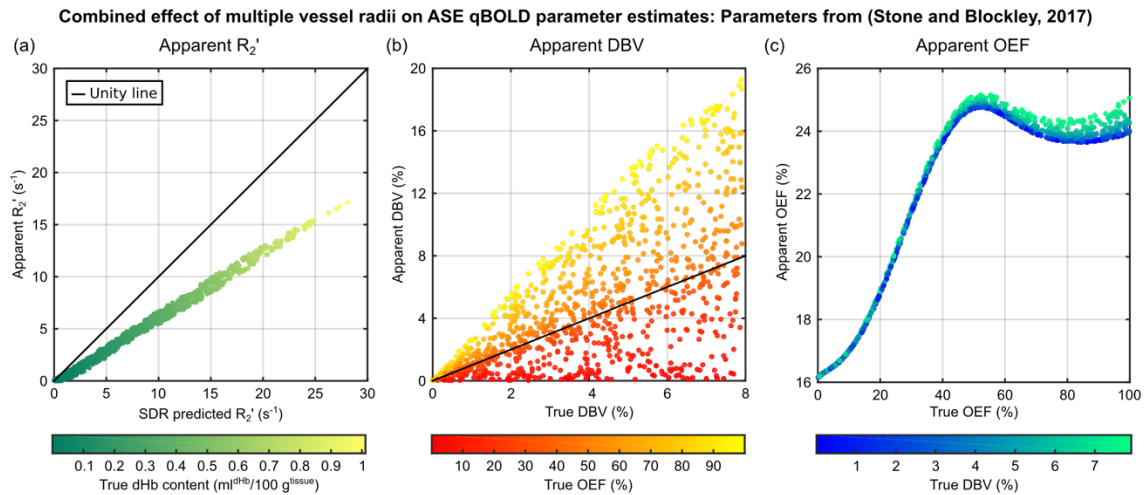

**Fig. 8.** The effect of multiple vessel radii simulations on the qBOLD parameter estimates was considered by generating many pairs of OEF and CBV values. ASE pulse sequence parameters were  $t_E=80$  ms with  $\tau=0$  and  $\tau=16$  to 64 ms in 4 ms steps following the work of (Stone and Blockley, 2017). (a) The apparent  $R_2'$  is linearly dependent on the  $R_2'$  predicted by the SDR model, but with a different gradient. (b) A large amount of uncertainty in the apparent DBV is observed. (c) The apparent OEF appears to plateau beyond 50%, but monotonically increases with true OEF for lower values. Markers are coloured to reflect true dHb content, true OEF and true DBV for parts (a), (b) and (c), respectively.



**Multiple vessel radii: Parameters from (Stone and Blockley, 2017)**

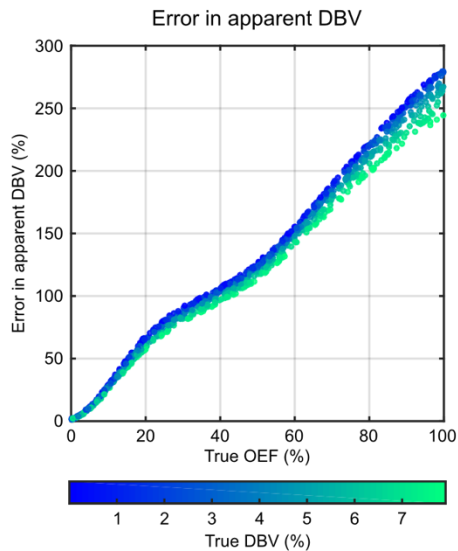

**Fig. 9.** The uncertainty in DBV in Fig. 8 was investigated by plotting apparent DBV as a function of true OEF. ASE pulse sequence parameters are the same as detailed in Fig. 8. The results suggest that the error in the apparent DBV is OEF dependent. Markers are coloured to reflect their true DBV.

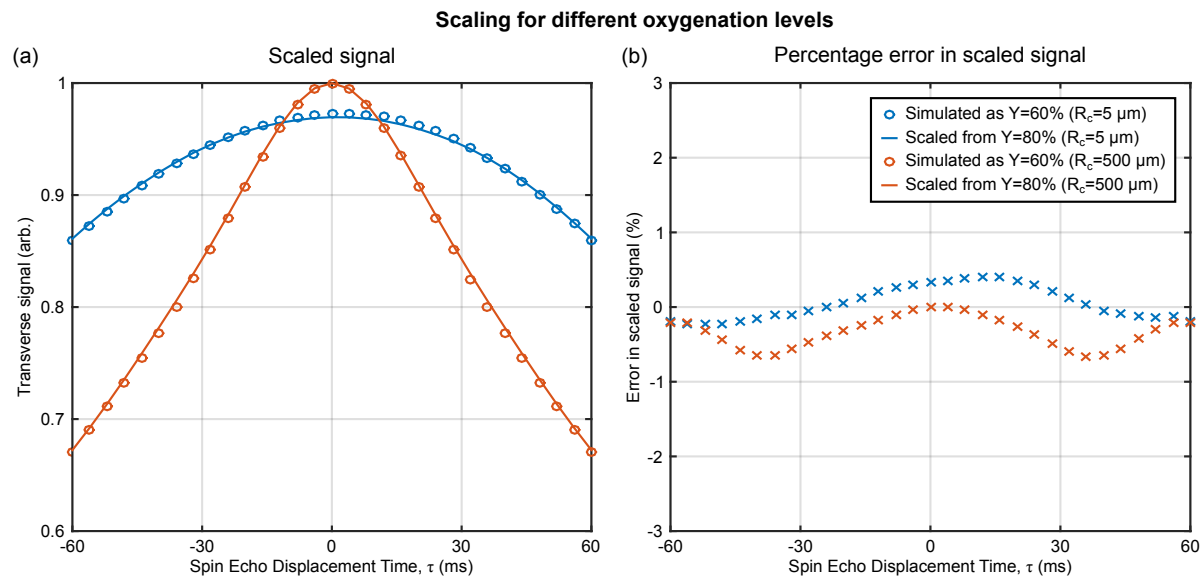

**Fig. S1.** Monte Carlo simulations can be accelerated to calculate different oxygenations by saving the phase accumulated by each proton for a nominal oxygenation value. Since phase scales linearly with oxygenation, the simulated phase accrual can be scaled to a target oxygenation prior to the estimation of the signal (Blockley et al., 2008). (a) Two examples are shown here: (i) a vessel radius of 5  $\mu\text{m}$  simulated as Y=60% (blue markers) and simulated as Y=80% and scaled to Y=60% (blue line) and (ii) a vessel radius of 500  $\mu\text{m}$  simulated as Y=60% (red markers) and simulated as Y=80% and scaled to Y=60% (red line). (b) The percentage error between the simulated and scaled signals are also displayed i.e.

$$\left( S^{simulated} - S^{scaled} \right) / S^{simulated}.$$

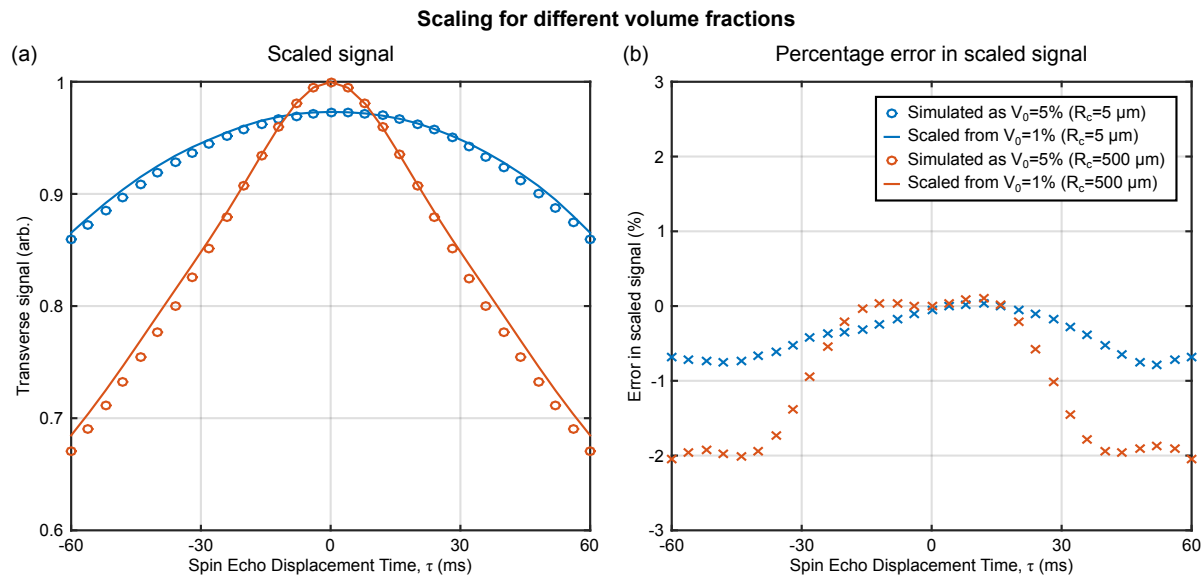

**Fig. S2.** Monte Carlo simulations can also be accelerated to calculate different blood volume fractions. This is achieved by estimating an oxygenation and vessel radius dependent shape function (Dickson et al., 2011; Kiselev and Posse, 1999). This shape function can then be arbitrarily scaled for different blood volume fractions. (a) Two examples are shown here: (i) a vessel radius of 5  $\mu\text{m}$  simulated as  $V_0=5\%$  (blue markers) and simulated as  $V_0=1\%$  and scaled to  $V_0=5\%$  (blue line) and (ii) a vessel radius of 500  $\mu\text{m}$  simulated as  $V_0=5\%$  (red markers) and simulated as  $V_0=1\%$  and scaled to  $V_0=5\%$  (red line). (b) The percentage error between the simulated and scaled signals are also displayed i.e.  $(S^{simulated} - S^{scaled})/S^{simulated}$ .

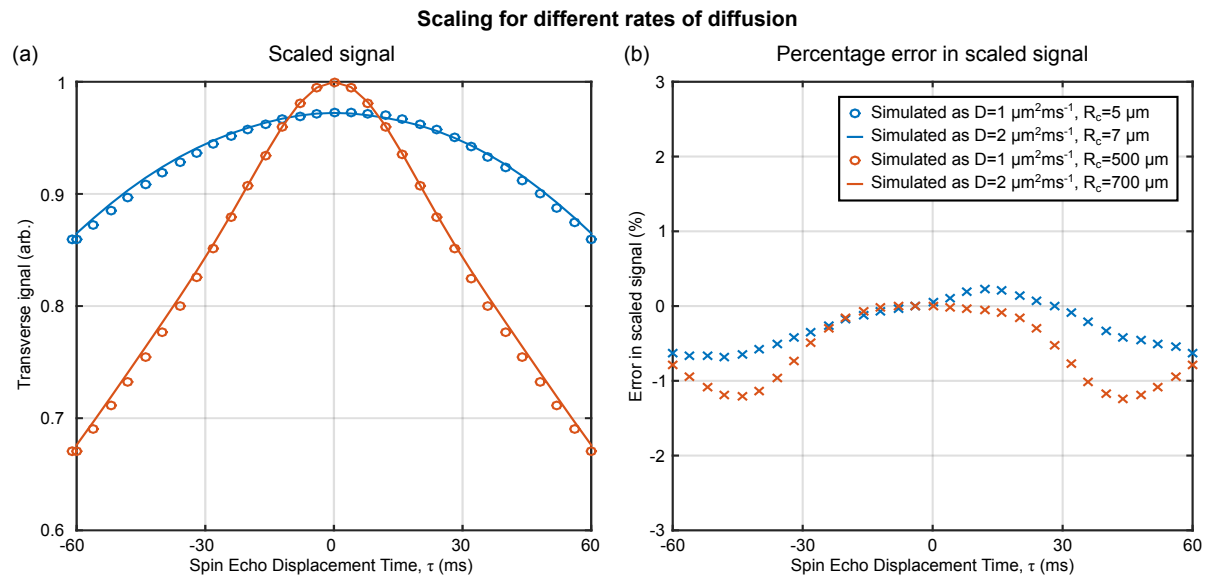

**Fig. S3.** Monte Carlo simulations can also be accelerated to simulate the effect of different diffusion coefficients,  $D$ . The effect of diffusion is a function of vessel radius and diffusion coefficient through the characteristic diffusion time  $\tau_D \propto R_c^2/D$  (Yablonskiy and Haacke, 1994). Therefore, the effect of a change in diffusion can be simulated by scaling the vessel radius e.g. scaling  $D$  by a factor of 2 requires  $R_c$  to be scaled by  $\sqrt{2}$ . (a) Two examples are shown here: (i) a vessel radius of 5  $\mu\text{m}$  simulated with  $D=1 \mu\text{m}^2\text{ms}^{-1}$  (blue markers) compared with a vessel radius of 7  $\mu\text{m}$  simulated with  $D=2 \mu\text{m}^2\text{ms}^{-1}$  (blue line) and (ii) a vessel radius of 500  $\mu\text{m}$  simulated with  $D=1 \mu\text{m}^2\text{ms}^{-1}$  (red markers) compared with a vessel radius of 700  $\mu\text{m}$  simulated with  $D=2 \mu\text{m}^2\text{ms}^{-1}$  (red line). (b) The percentage error between the simulated and scaled signals are also displayed i.e.  $(S^{\text{simulated}} - S^{\text{scaled}})/S^{\text{simulated}}$ .

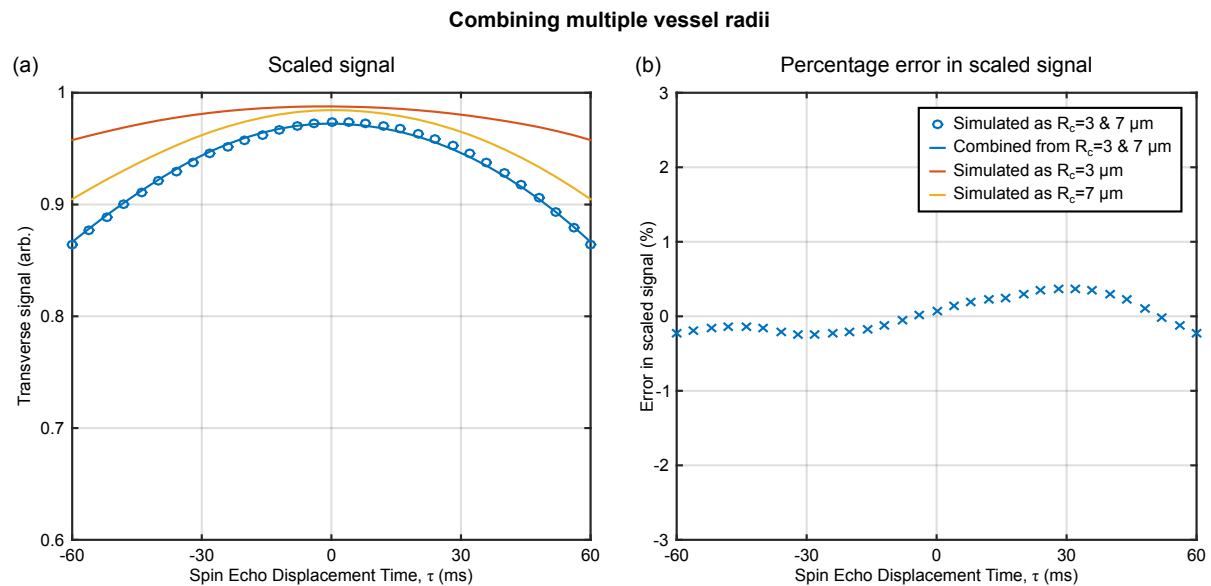

**Fig. S4.** The simulation of systems with multiple vessel radii can be simulated by combining the results of multiple single vessel radius simulations (Dickson et al., 2011; Kiselev and Posse, 1999). (a) In this example, simulations of a system with  $V_0=5\%$  equally split between vessels with  $R_c=3 \mu\text{m}$  and  $R_c=7 \mu\text{m}$  (blue markers). Single vessel simulations of  $R_c=3 \mu\text{m}$  (red line) and  $R_c=7 \mu\text{m}$  (yellow line) with  $V_0=2.5\%$ . The combined effect of these single vessel simulations is obtained by taking the product of these signal curves (blue line). (b) The percentage error between the simulated and combined signals are also displayed i.e.

$$\frac{(S^{\text{simulated}} - S^{\text{combined}})}{S^{\text{simulated}}}.$$

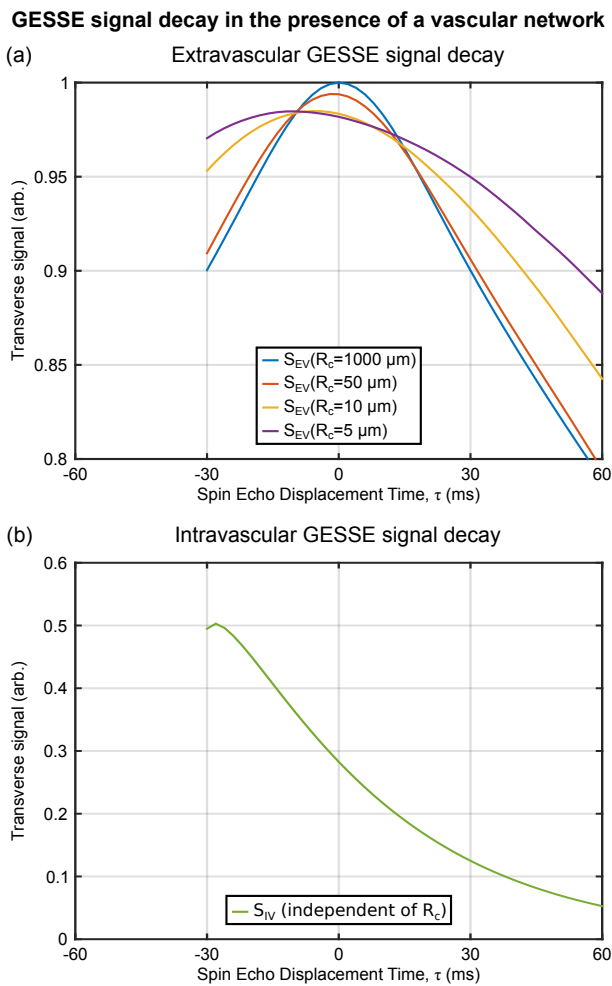

**Fig. S5.** Examples of the signal decay from the GESSE pulse sequence. The extravascular signal ( $S_{EV}$ ) decay is observed to be asymmetric with respect to  $\tau=0$  as the vessel radius is reduced. (b) The intravascular signal ( $S_{IV}$ ) decay shows considerable signal attenuation which is highly asymmetric with respect to  $\tau$  and appears almost exponential in form.

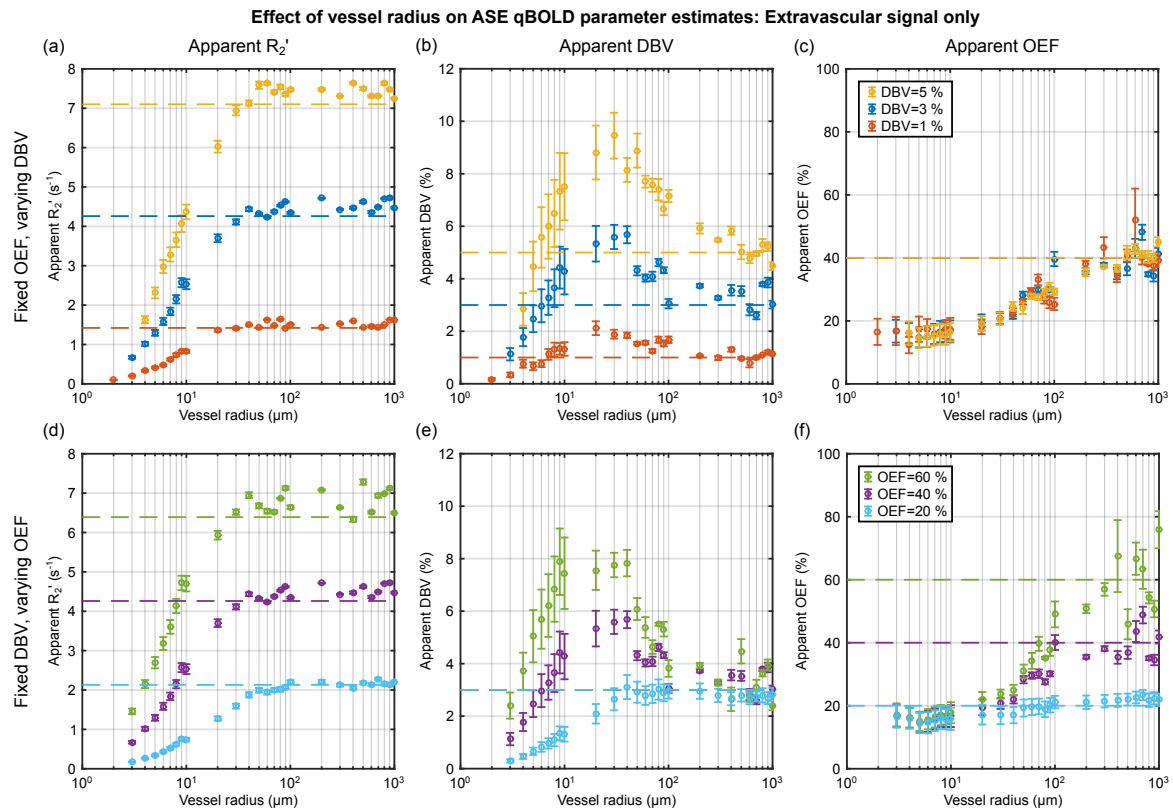

**Fig. S6.** Reproduction of Fig. 3 for simulations of the extravascular signal only. As in Fig. 3, simulations were first performed with a fixed OEF ( $E_0=40\%$ ) and three DBV values (top) then with a fixed DBV ( $V_0=3\%$ ) and three values of OEF (bottom). The apparent  $R_2'$  (left) is estimated for each OEF-DBV pair and presented alongside the  $R_2'$  values predicted by the SDR qBOLD model (dashed lines). Likewise the apparent DBV (centre) and apparent OEF (right) are presented alongside the true DBV and OEF, respectively, (dashed lines).

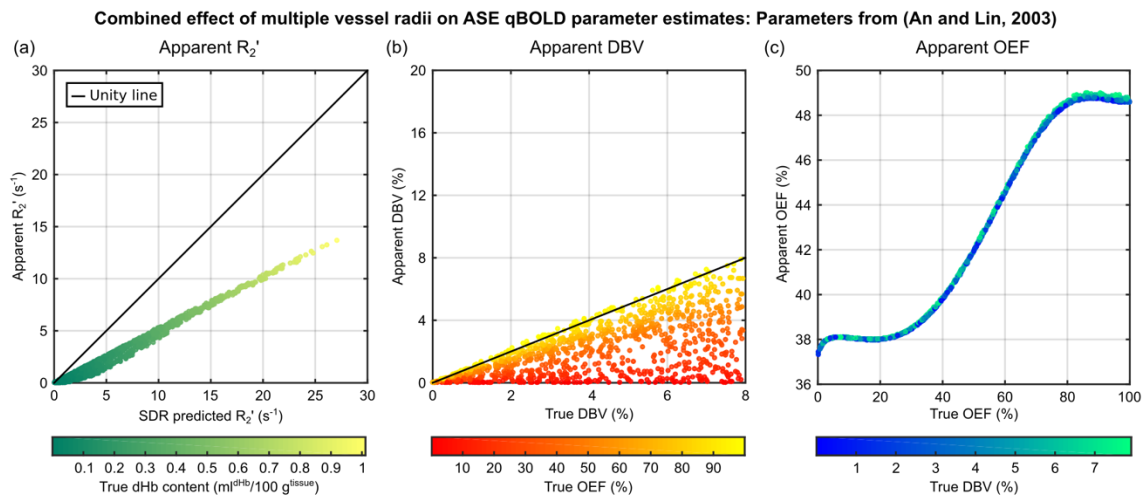

**Fig. S7.** The effect of multiple vessel radii simulations on the qBOLD parameter estimates was considered by generating many pairs of OEF and CBV values. ASE pulse sequence parameters were  $tE=64$  ms with  $\tau=0$  and  $\tau=10$  to 18 ms in 4 ms steps following the work of (An and Lin, 2003). (a) The apparent  $R_2'$  is linearly dependent on the  $R_2'$  predicted by the SDR model, in common with the parameters used in Fig. 7 but with a shallower gradient. (b) Uncertainty is similarly observed in the apparent DBV, but with a reduced range of values. (c) In contrast to Fig. 7c, the apparent OEF has a largely monotonic relationship with the true OEF. Markers are coloured to reflect true dHb content, true OEF and true DBV for parts (a), (b) and (c), respectively.



**Multiple vessel radii: Parameters from (An & Lin, 2003)**

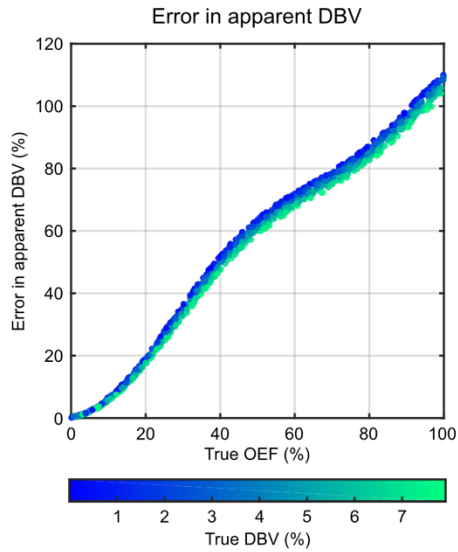

**Fig. S8.** The uncertainty in DBV in Fig. S7 was investigated by plotting apparent DBV as a function of true OEF. ASE pulse sequence parameters are the same as detailed in Fig. S7. In common with Fig. 9, these results suggest that the error in the apparent DBV is OEF dependent. Markers are coloured to reflect their true DBV.
